# Supplementary material for: Direct and chemoselective transformation of cysteine to dehydroalanine on peptides
Source: Royal Society of Chemistry journal article supplement (doi:10.1039/d5cc00156k), 2025-01-01

## Supplementary Information

### Direct and chemoselective transformation of cysteine to dehydroalanine on peptides

Taiki Mori,<sup>a</sup> Kazuki Sakata<sup>b</sup> and Seiji Shirakawa\*<sup>a</sup>

<sup>a</sup>*Institute of Integrated Science and Technology, Nagasaki University, 1-14 Bunkyo-machi, Nagasaki 852-8521, Japan.* <sup>b</sup>*Spiber Inc., 234-1 Mizukami, Kakuganji, Tsuruoka, Yamagata 997-0052, Japan.*

*E-mail: seijishirakawa@nagasaki-u.ac.jp*

### Table of Contents

|                                                                           |      |
|---------------------------------------------------------------------------|------|
| <b>Scheme S1</b>                                                          | S-2  |
| <b>General Information</b>                                                | S-3  |
| <b>Experimental Section</b>                                               | S-4  |
| 1. Synthesis of substrates                                                | S-4  |
| 2. General methods for the preparation of dehydroamino acid derivatives   | S-6  |
| 3. Preparation and transformations of dehydroalanine derivative <b>11</b> | S-11 |
| <b>References</b>                                                         | S-14 |
| <b>NMR Charts</b>                                                         | S-15 |
| <b>HPLC Charts</b>                                                        | S-36 |

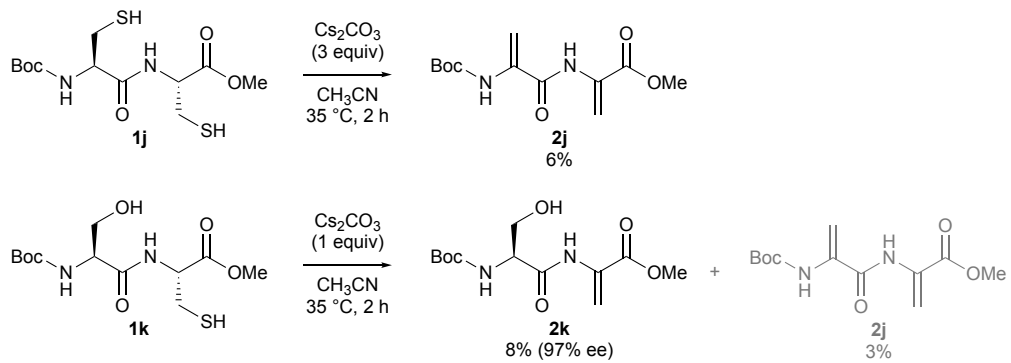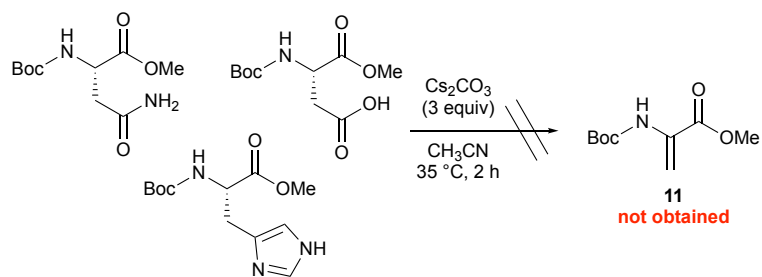

**Scheme S1** Additional reactions.

## General Information

$^1\text{H}$  and  $^{13}\text{C}$  NMR spectra were measured on a JEOL JNM-ECZ 400R NMR instrument (400 MHz for  $^1\text{H}$  NMR, 100 MHz for  $^{13}\text{C}$  NMR). Tetramethylsilane (TMS) served as the internal standard (0 ppm) for  $^1\text{H}$  NMR, and solvent peaks served as the internal standard (77.0 ppm for  $\text{CDCl}_3$ ; 49.0 ppm for  $\text{CD}_3\text{OD}$ ; 39.5 ppm for  $\text{DMSO-d}_6$ ) for  $^{13}\text{C}$  NMR. The following abbreviations were used to express the multiplicities: s = singlet; d = doublet; t = triplet; q = quartet; m = multiplet; br = broad. High-resolution mass spectra (HRMS) were measured on a JEOL JMS-700N. Infrared spectra (IR) were measured on a JASCO FT/IR-4200 spectrometer. Optical rotations were measured on a JASCO P-2100 polarimeter. High performance liquid chromatography (HPLC) was performed on Shimadzu LC-20AT and SPD-20A instruments using Daicel Chiralpak AD-3, ID-3, or IE-3 columns (4.6 mm  $\times$  250 mm). All reactions were monitored by thin-layer chromatography using Merck precoated TLC plates (silica gel 60GF-254, 0.25 mm), with visualization by the use of UV lamp (254 nm) or dyes. The products were purified by flash column chromatography on silica gel.

## Experimental Section

### 1. Preparation of substrates

Dipeptide substrates [**1** (except **1h**), **3**, and **5**] and amino acid-derived substrates [**6** and **10**] are known and commercially available compounds.

Dipeptide substrate **1h** and tripeptide substrate **8** were prepared according to the general synthetic methods for peptides as shown in below.

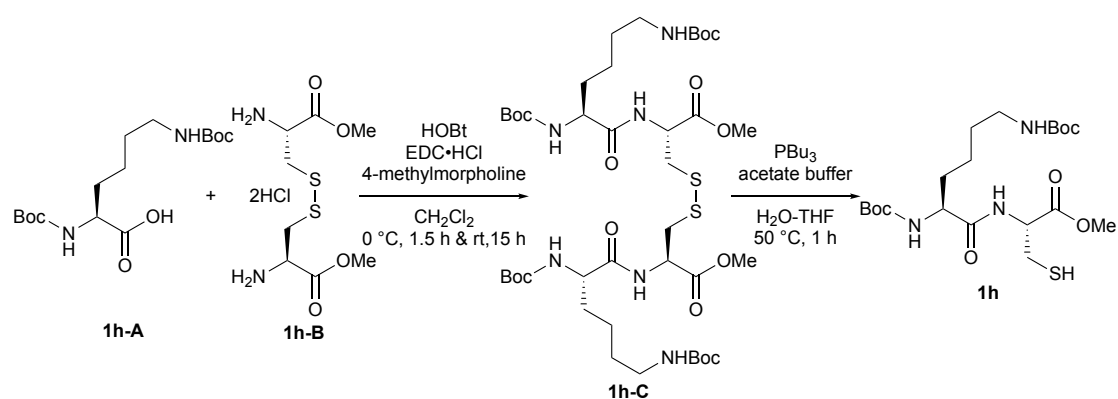

To a solution of Boc-protected lysine derivative **1h-A** (0.35 g, 1.0 mmol) in  $\text{CH}_2\text{Cl}_2$  (5 mL) was added 1-hydroxybenzotriazole (HOBt, 0.14 g, 1.0 mmol) and 1-(3-dimethylaminopropyl)-3-ethylcarbodiimide hydrochloride ( $\text{EDC}\cdot\text{HCl}$ , 0.19 g, 1.0 mmol) at  $0\text{ }^\circ\text{C}$ . The reaction mixture was stirred for 1.5 hours at  $0\text{ }^\circ\text{C}$ . After 1.5 hours, 4-methylmorpholine (0.12 g, 1.2 mmol) and cystine dimethyl ester dihydrochloride **1h-B** (0.15 g, 0.45 mmol) were added to the reaction mixture at  $0\text{ }^\circ\text{C}$ , and the resulting mixture was stirred for 1.5 hours at  $0\text{ }^\circ\text{C}$ . The mixture was then warmed to room temperature and stirred for additional 15 hours. After 15 hours,  $\text{H}_2\text{O}$  (5 mL) was added to the reaction mixture at room temperature. After evaporation to remove  $\text{CH}_2\text{Cl}_2$ , the reaction products were extracted three times with ethyl acetate ( $5\text{ mL} \times 3$ ). The combined ethyl acetate extracts were washed with saturated aqueous  $\text{NaHCO}_3$  for three times ( $5\text{ mL} \times 3$ ) and brine ( $5\text{ mL} \times 1$ ). The resulting ethyl acetate solution was dried over  $\text{Na}_2\text{SO}_4$ . Following filtration to remove  $\text{Na}_2\text{SO}_4$ , the filtrate was concentrated. The residue was purified by flash column chromatography on silica gel (hexane/ethyl acetate = 10:1–1:2 as the eluent) to afford disulfide **1h-C** (0.35 g, 0.38 mmol).

To a solution of disulfide **1h-C** (0.28 g, 0.30 mmol) in THF (2 mL) was added 0.1M acetate ( $\text{AcOH}\cdot\text{AcONa}$ ) buffer solution [pH 4.7] (1 mL) and tributylphosphine (67

mg, 0.33 mmol) at room temperature. The reaction mixture was warmed to 50 °C and stirred for 1 hour at 50 °C. After 1 hour, the reaction mixture was cooled to room temperature. H<sub>2</sub>O (5 mL) was added to the resulting solution at room temperature and the reaction products were extracted three times with ethyl acetate (5 mL × 3). The combined ethyl acetate extracts were dried over Na<sub>2</sub>SO<sub>4</sub>. Following filtration to remove Na<sub>2</sub>SO<sub>4</sub>, the filtrate was concentrated. The residue was purified by flash column chromatography on silica gel (hexane/ethyl acetate = 10:1–1:2 as the eluent) to afford dipeptide **1h** in 91% yield (0.25 g, 0.54 mmol, white solid).

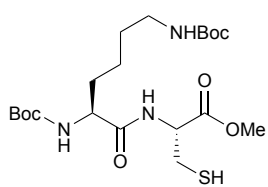

**1h**:  $[\alpha]_D^{27} +1.2$  ( $c = 1.3$ , CHCl<sub>3</sub>); <sup>1</sup>H NMR (400 MHz, CDCl<sub>3</sub>)  $\delta$  6.97 (d,  $J = 6.9$  Hz, 1H), 5.19 (br, 1H), 4.87–4.83 (m, 1H), 4.65 (br, 1H), 4.12–4.06 (br m, 1H), 3.79 (s, 3H), 3.15–3.10 (br m, 2H), 3.03–2.99 (m, 2H), 1.88–1.38 (m, 7H), 1.45 (s, 9H), 1.44 (s, 9H); <sup>13</sup>C NMR (100 MHz, CDCl<sub>3</sub>)  $\delta$  172.2, 170.1, 155.9, 155.6, 79.5, 78.6, 54.1, 53.6, 52.4, 39.6, 31.4, 29.3, 28.1, 28.0, 26.2, 22.2; IR (neat): 3312, 2979, 2933, 1693, 1507, 1366, 1248, 1166, 907, 727 cm<sup>-1</sup>; HRMS (FAB) calcd for C<sub>20</sub>H<sub>38</sub>N<sub>3</sub>O<sub>7</sub>S: 464.2430 ([M+H]<sup>+</sup>), found 464.2431.

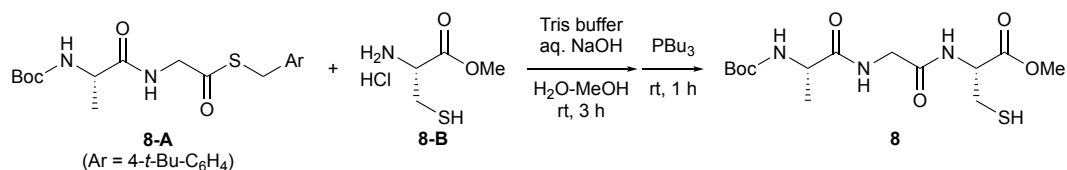

A solution of peptide **8-A** (0.57 g, 1.4 mmol) in methanol (5 mL) was added to a mixture of cysteine methyl ester hydrochloride **8-B** (0.70 g, 4.1 mmol), H<sub>2</sub>O (3 mL), 1M TRIS buffer solution [pH 8.0] (1 mL), and 5M aqueous NaOH (1 mL) at room temperature. The mixture was stirred for 3 hours at room temperature. After 3 hours, tributylphosphine (0.34 g, 1.7 mmol) was added to the reaction mixture at room temperature. The resulting mixture was stirred for 1 hour at room temperature. After 1 hour, the reaction products were extracted three times with ethyl acetate (5 mL × 3). The combined ethyl acetate extracts were washed with saturated aqueous NH<sub>4</sub>Cl (10 mL × 1) and brine (10 mL × 1). The resulting ethyl acetate solution was dried over Na<sub>2</sub>SO<sub>4</sub>. Following filtration to remove Na<sub>2</sub>SO<sub>4</sub>, the filtrate was concentrated. The residue was purified by flash column chromatography on silica gel (hexane/ethyl acetate = 2:1–1:10

as the eluent) to afford tripeptide **8** in 75% yield (0.37 g, 1.0 mmol, white solid).

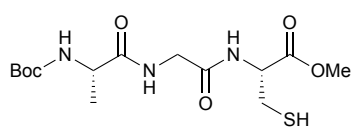

**8**:  $[\alpha]_D^{24} -22.7$  ( $c = 0.80$ , MeOH);  $^1\text{H}$  NMR (400 MHz,  $\text{CD}_3\text{OD}$ )  $\delta$  4.65 (t,  $J = 5.7$  Hz, 1H), 4.04 (q,  $J = 7.2$  Hz, 1H), 3.94 (d,  $J = 16.7$  Hz, 1H), 3.87 (d,  $J = 16.9$  Hz, 1H), 3.74 (s, 3H), 2.95 (dd,  $J = 14.0, 4.8$  Hz, 1H), 2.89 (dd,  $J = 14.0, 6.8$  Hz, 1H), 1.44 (s, 9H), 1.33 (d,  $J = 7.3$  Hz, 3H);  $^{13}\text{C}$  NMR (100 MHz,  $\text{CD}_3\text{OD}$ )  $\delta$  176.2, 171.7, 171.3, 157.6, 80.5, 55.9, 53.0, 51.6, 43.4, 28.7, 26.5, 18.1; IR (neat): 3301, 2979, 1660, 1522, 1249, 1167  $\text{cm}^{-1}$ ; HRMS (EI) calcd for  $\text{C}_{14}\text{H}_{25}\text{N}_3\text{O}_6\text{S}$ : 363.1464 ( $[\text{M}]^+$ ), found 363.1471.

## 2. General methods for the preparation of dehydroamino acid derivatives [2, 4, 7, and 9] (Schemes 2 and 3)

A solution of dipeptide **1** [or **3**, or **5**, or threonine derivative **6**, or tripeptide **8**] (0.30 mmol) in acetonitrile (3.0 mL) was warmed to 35 °C and stirred for 5 min. Cesium carbonate (98 mg, 0.30 mmol, 1 equiv) was then added to the warmed solution. The reaction mixture was stirred for 2 hours at 35 °C under open air conditions. After 2 hours,  $\text{H}_2\text{O}$  (5 mL) was added to the reaction mixture. The reaction products were initially extracted three times with ethyl acetate (5 mL  $\times$  3). After acidifying the aqueous phase with 1N HCl, further extraction was performed three times with ethyl acetate (5 mL  $\times$  3). The combined ethyl acetate extracts were dried over  $\text{Na}_2\text{SO}_4$ . Following filtration to remove  $\text{Na}_2\text{SO}_4$ , the filtrate was concentrated. The residue was purified by flash column chromatography on silica gel (hexane/ethyl acetate as the eluent) to afford dehydroamino acid derivative **2** [or **4**, or **7**, or **9**].

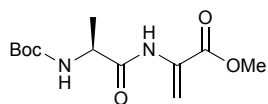

**2a**:<sup>1-3</sup> 56% yield (46 mg, 0.17 mmol, white solid).  $[\alpha]_D^{20} -73.6$  ( $c = 1.1$ ,  $\text{CHCl}_3$ , >99% ee); HPLC analysis: Daicel Chiralpak IE-3, hexane/2-propanol = 2:1, flow rate = 0.5 mL/min, 254 nm; retention time: 16.8 min (minor) and 22.6 min (major).  $^1\text{H}$  NMR (400 MHz,  $\text{CDCl}_3$ )  $\delta$  8.45 (br, 1H), 6.61 (s, 1H), 5.91 (d,  $J = 1.4$  Hz, 1H), 4.94 (br, 1H), 4.26 (br, 1H), 3.85 (s, 3H), 1.46 (s, 9H), 1.41 (d,  $J = 7.1$  Hz, 3H);  $^{13}\text{C}$  NMR (100 MHz,  $\text{CDCl}_3$ )  $\delta$  171.5, 164.2, 155.4, 130.8, 109.2, 80.5, 52.9, 50.9, 28.2, 17.9; IR (neat): 3332, 2979, 1683, 1515, 1442, 1323, 1248, 1162, 733  $\text{cm}^{-1}$ ; HRMS (EI) calcd for  $\text{C}_{12}\text{H}_{20}\text{N}_2\text{O}_5$ : 272.1372 ( $[\text{M}]^+$ ), found 272.1372.

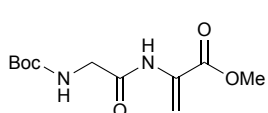

**2b**:<sup>1,3,4</sup> 57% yield (44 mg, 0.17 mmol, colorless viscous oil). <sup>1</sup>H NMR (400 MHz, CDCl<sub>3</sub>) δ 8.31 (br, 1H), 6.62 (s, 1H), 5.92 (d, *J* = 1.4 Hz, 1H), 5.13 (br, 1H), 3.90 (d, *J* = 5.7 Hz, 2H), 3.85 (s, 3H), 1.48 (s, 9H); <sup>13</sup>C NMR (100 MHz, CDCl<sub>3</sub>) δ 168.4, 164.2, 156.0, 130.5, 109.3, 80.5, 52.9, 45.1, 28.2; IR (neat): 3379, 2979, 1684, 1514, 1327, 1250, 1202, 1162 cm<sup>-1</sup>; HRMS (EI) calcd for C<sub>11</sub>H<sub>18</sub>N<sub>2</sub>O<sub>5</sub>: 258.1216 ([M]<sup>+</sup>), found 258.1216.

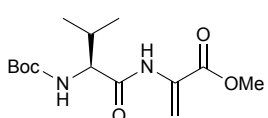

**2c**:<sup>5</sup> 54% yield (49 mg, 0.16 mmol, white solid). [α]<sup>18</sup><sub>D</sub> -25.5 (*c* = 1.2, CHCl<sub>3</sub>, >99% ee); HPLC analysis: Daicel Chiralpak IE-3, hexane/2-propanol = 5:1, flow rate = 0.5 mL/min, 254 nm; retention time: ~35 min [not detected] (minor) and 38.3 min (major). <sup>1</sup>H NMR (400 MHz, CDCl<sub>3</sub>) δ 8.19 (br, 1H), 6.63 (s, 1H), 5.92 (d, *J* = 1.4 Hz, 1H), 5.04 (br d, *J* = 7.1 Hz, 1H), 4.08–4.01 (br m, 1H), 3.85 (s, 3H), 2.26–2.18 (m, 1H), 1.46 (s, 9H), 0.99 (d, *J* = 6.6 Hz, 3H), 0.93 (d, *J* = 6.9 Hz, 3H); <sup>13</sup>C NMR (100 MHz, CDCl<sub>3</sub>) δ 170.6, 164.3, 155.8, 130.5, 109.3, 80.2, 60.6, 53.0, 30.7, 28.2, 19.3, 17.5; IR (neat): 3313, 2971, 1726, 1675, 1522, 1366, 1322, 1204, 1168 cm<sup>-1</sup>; HRMS (EI) calcd for C<sub>14</sub>H<sub>24</sub>N<sub>2</sub>O<sub>5</sub>: 300.1685 ([M]<sup>+</sup>), found 300.1685.

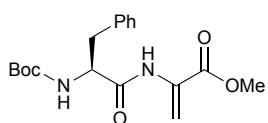

**2d**:<sup>3,5,6</sup> 62% yield (65 mg, 0.19 mmol, white solid). [α]<sup>19</sup><sub>D</sub> -26.5 (*c* = 1.1, CHCl<sub>3</sub>, 94% ee); HPLC analysis: Daicel Chiralpak IE-3, hexane/2-propanol = 2:1, flow rate = 0.5 mL/min, 254 nm; retention time: 21.0 min (minor) and 23.9 min (major). <sup>1</sup>H NMR (400 MHz, CDCl<sub>3</sub>) δ 8.15 (br, 1H), 7.33–7.29 (m, 2H), 7.26–7.18 (m, 3H), 6.62 (s, 1H), 5.90 (d, *J* = 1.1 Hz, 1H), 4.96 (br, 1H), 4.44 (br, 1H), 3.80 (s, 3H), 3.16–3.08 (m, 2H), 1.41 (s, 9H); <sup>13</sup>C NMR (100 MHz, CDCl<sub>3</sub>) δ 170.2, 164.0, 155.3, 136.2, 130.5, 129.1, 128.7, 127.0, 109.3, 80.5, 56.5, 52.9, 38.1, 28.2; IR (neat): 3313, 2979, 1723, 1677, 1521, 1500, 1440, 1367, 1324, 1251, 1203, 1165 cm<sup>-1</sup>; HRMS (EI) calcd for C<sub>18</sub>H<sub>24</sub>N<sub>2</sub>O<sub>5</sub>: 348.1685 ([M]<sup>+</sup>), found 348.1683.

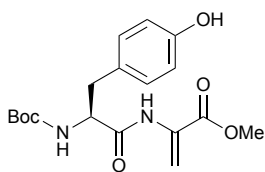

**2e**:<sup>5,7</sup> 45% yield (49 mg, 0.14 mmol, white solid).  $[\alpha]_{\text{D}}^{21} -4.1$  ( $c = 0.99$ ,  $\text{CH}_3\text{OH}$ , 96% ee); HPLC analysis: Daicel Chiralpak AD-3, hexane/2-propanol = 2:1, flow rate = 0.5 mL/min, 254 nm; retention time: 16.7 min (minor) and 19.8 min (major).  $^1\text{H}$  NMR (400 MHz,  $\text{DMSO-d}_6$ )  $\delta$  9.28 (s, 1H), 9.19 (s, 1H), 7.17 (d,  $J = 8.2$  Hz, 1H), 7.08 (d,  $J = 8.2$  Hz, 2H), 6.65 (d,  $J = 8.5$  Hz, 2H), 6.26 (s, 1H), 5.72 (s, 1H), 4.27–4.21 (m, 1H), 3.77 (s, 3H), 2.89 (dd,  $J = 13.8, 4.0$  Hz, 1H), 2.64 (dd,  $J = 13.6, 10.6$  Hz, 1H), 1.32 (s, 9H);  $^{13}\text{C}$  NMR (100 MHz,  $\text{DMSO-d}_6$ )  $\delta$  171.8, 163.8, 155.8, 155.5, 132.3, 130.2, 127.9, 114.8, 109.1, 78.4, 56.7, 52.8, 35.9, 28.1; IR (neat): 3340, 2979, 2930, 1701, 1515, 1365, 1222, 1203, 1163, 733  $\text{cm}^{-1}$ ; HRMS (FAB) calcd for  $\text{C}_{18}\text{H}_{25}\text{N}_2\text{O}_6$ : 365.1713 ( $[\text{M}+\text{H}]^+$ ), found 365.1699.

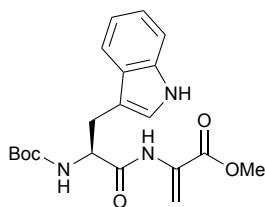

**2f**:<sup>5,7</sup> 62% yield (72 mg, 0.19 mmol, white solid).  $[\alpha]_{\text{D}}^{22} -8.0$  ( $c = 1.2$ ,  $\text{CHCl}_3$ , >99% ee); HPLC analysis: Daicel Chiralpak IE-3, hexane/2-propanol = 2:1, flow rate = 0.5 mL/min, 254 nm; retention time: 16.6 min (minor) and 19.0 min (major).  $^1\text{H}$  NMR (400 MHz,  $\text{CDCl}_3$ )  $\delta$  8.16–8.09 (br m, 2H), 7.61 (d,  $J = 8.0$  Hz, 1H), 7.36 (dt,  $J = 8.0, 1.0$  Hz, 1H), 7.20 (td,  $J = 8.0, 1.0$  Hz, 1H), 7.12 (td,  $J = 8.0, 1.0$  Hz, 1H), 7.06 (d,  $J = 2.3$  Hz, 1H), 6.61 (s, 1H), 5.87 (s, 1H), 5.12 (br, 1H), 4.54 (br, 1H), 3.73 (s, 3H), 3.40–3.21 (m, 2H), 1.42 (s, 9H);  $^{13}\text{C}$  NMR (100 MHz,  $\text{CDCl}_3$ )  $\delta$  170.8, 163.8, 155.5, 136.2, 130.6, 127.3, 123.1, 122.2, 119.7, 118.7, 111.2, 110.0, 109.2, 80.4, 55.9, 52.8, 28.2, 27.9; IR (neat): 3385, 2980, 2954, 2930, 1682, 1518, 1440, 1327, 1202, 1162, 907, 728  $\text{cm}^{-1}$ ; HRMS (FAB) calcd for  $\text{C}_{20}\text{H}_{25}\text{N}_3\text{O}_5$ : 387.1794 ( $[\text{M}]^+$ ), found 387.1795.

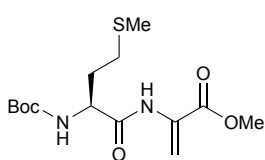

**2g**: 57% yield (57 mg, 0.17 mmol, white solid).  $[\alpha]_{\text{D}}^{21} -26.5$  ( $c = 1.2$ ,  $\text{CHCl}_3$ , 95% ee); HPLC analysis: Daicel Chiralpak IE-3, hexane/2-propanol = 2:1, flow rate = 0.5 mL/min, 254 nm; retention time: 26.1 min (major) and 36.5 min (minor).  $^1\text{H}$  NMR (400 MHz,  $\text{CDCl}_3$ )  $\delta$  8.47 (br, 1H), 6.60 (s, 1H), 5.93 (d,  $J = 1.4$  Hz, 1H), 5.18 (br d,  $J = 6.2$  Hz, 1H), 4.42–4.33 (br m, 1H), 3.85 (s, 3H), 2.64–2.52 (m, 2H), 2.20–2.12 (m, 1H), 2.12 (s, 3H), 2.00–1.91 (m, 1H), 1.46 (s, 9H);  $^{13}\text{C}$  NMR (100 MHz,  $\text{CDCl}_3$ )  $\delta$  170.5, 164.1, 155.5, 130.7, 109.5, 80.5, 54.2, 53.0, 31.3, 30.2, 28.2, 15.2; IR (neat): 3313, 2979, 2919, 1678, 1515, 1440, 1322, 1248, 1202, 1161, 732  $\text{cm}^{-1}$ ; HRMS (FAB) calcd for



C<sub>14</sub>H<sub>25</sub>N<sub>2</sub>O<sub>5</sub>S: 333.1484 ([M+H]<sup>+</sup>), found 333.1484.

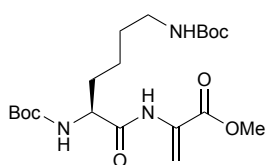

**2h**: 56% yield (72 mg, 0.17 mmol, white solid).  $[\alpha]^{27}_D -31.7$  ( $c = 0.90$ , CHCl<sub>3</sub>, >99% ee); HPLC analysis: Daicel Chiralpak IE-3, hexane/2-propanol = 1:1, flow rate = 0.5 mL/min, 254 nm; retention time: 18.2 min (major) and ~29 min [not detected] (minor). <sup>1</sup>H NMR (400 MHz, CDCl<sub>3</sub>)  $\delta$  8.39 (br, 1H), 6.60 (s, 1H), 5.91 (d,  $J = 1.1$  Hz, 1H), 5.20 (br, 1H), 4.60 (br, 1H), 4.15 (br, 1H), 3.84 (s, 3H), 3.15–3.10 (m, 2H), 1.94–1.25 (m, 6H), 1.46 (s, 9H), 1.44 (s, 9H); <sup>13</sup>C NMR (100 MHz, CDCl<sub>3</sub>)  $\delta$  171.1, 164.0, 156.0, 155.7, 130.6, 109.1, 79.9, 78.7, 55.1, 52.7, 39.5, 31.1, 29.5, 28.2, 28.0, 22.3; IR (neat): 3384, 3331, 2979, 2933, 1683, 1509, 1366, 1249, 1163, 909, 729 cm<sup>-1</sup>; HRMS (FAB) calcd for C<sub>20</sub>H<sub>36</sub>N<sub>3</sub>O<sub>7</sub>: 430.2553 ([M+H]<sup>+</sup>), found 430.2542.

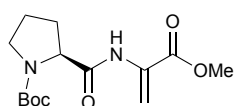

**2i**:<sup>8</sup> 54% yield (48 mg, 0.16 mmol, white solid).  $[\alpha]^{24}_D -92.2$  ( $c = 1.1$ , CHCl<sub>3</sub>, >99% ee); HPLC analysis: Daicel Chiralpak ID-3, hexane/2-propanol = 2:1, flow rate = 0.5 mL/min, 254 nm; retention time: 13.6 min (minor) and 20.6 min (major). <sup>1</sup>H NMR (400 MHz, CDCl<sub>3</sub>)  $\delta$  9.20–8.15 (br m, 1H), 6.60 (s, 1H), 5.90 (s, 1H), 4.50–4.15 (br m, 1H), 3.84 (s, 3H), 3.60–3.25 (br m, 2H), 2.45–1.86 (m, 4H), 1.54–1.39 (br m, 9H); <sup>13</sup>C NMR (100 MHz, CDCl<sub>3</sub>)  $\delta$  171.6 & 171.0, 164.2, 155.8 & 154.3, 131.2 & 130.6, 108.9, 80.7, 61.9 & 60.8, 52.8, 47.1, 30.8 & 29.6, 28.4 & 28.2, 24.4 & 23.8; IR (neat): 3388, 2977, 1690, 1518, 1390, 1366, 1319, 1201, 1159, 1120 cm<sup>-1</sup>; HRMS (EI) calcd for C<sub>14</sub>H<sub>22</sub>N<sub>2</sub>O<sub>5</sub>: 298.1529 ([M]<sup>+</sup>), found 298.1532.

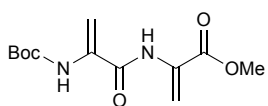

**2j**: 6% yield (4.9 mg, 0.018 mmol, white solid). <sup>1</sup>H NMR (400 MHz, CDCl<sub>3</sub>)  $\delta$  8.47 (br, 1H), 6.62 (s, 1H), 6.12 (br, 1H), 5.97 (d,  $J = 1.4$  Hz, 1H), 5.21–5.20 (m, 1H), 3.88 (s, 3H), 1.49 (s, 9H); <sup>13</sup>C NMR (100 MHz, CDCl<sub>3</sub>)  $\delta$  164.3, 162.3, 152.6, 134.8, 130.5, 109.4, 98.7, 80.8, 53.2, 28.2; IR (neat): 3406, 2979, 1678, 1495, 1340, 1161 cm<sup>-1</sup>; HRMS (EI) calcd for C<sub>12</sub>H<sub>18</sub>N<sub>2</sub>O<sub>5</sub>: 270.1216 ([M]<sup>+</sup>), found 270.1216.

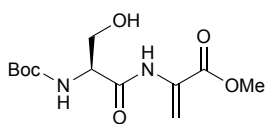

**2k**: 8% yield (6.9 mg, 0.024 mmol, white solid).  $[\alpha]^{21}_D -42.7$  ( $c = 0.73$ , CHCl<sub>3</sub>, 97% ee); HPLC analysis: Daicel Chiralpak IE-3, hexane/2-propanol = 2:1, flow rate = 0.5 mL/min, 254 nm;

retention time: 17.1 min (minor) and 32.3 min (major).  $^1\text{H}$  NMR (400 MHz,  $\text{CDCl}_3$ )  $\delta$  8.89 (br, 1H), 6.58 (s, 1H), 5.95 (d,  $J = 1.6$  Hz, 1H), 5.55 (br, 1H), 4.32–4.17 (br m, 2H), 3.85 (s, 3H), 3.75–3.68 (m, 1H), 2.47–2.44 (m, 1H), 1.48 (s, 9H);  $^{13}\text{C}$  NMR (100 MHz,  $\text{CDCl}_3$ )  $\delta$  170.2, 164.0, 156.1, 130.9, 109.7, 80.9, 62.5, 55.7, 53.0, 28.2; IR (neat): 3384, 2979, 2927, 1721, 1683, 1522, 1367, 1329, 1165  $\text{cm}^{-1}$ ; HRMS (FAB) calcd for  $\text{C}_{12}\text{H}_{21}\text{N}_2\text{O}_6$ : 289.1400 ( $[\text{M}+\text{H}]^+$ ), found 289.1401.

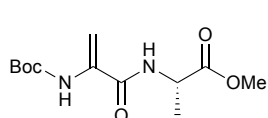

**4:9** 33% yield (27 mg, 0.099 mmol, white solid).  $[\alpha]_{\text{D}}^{17} +19.8$  ( $c = 0.77$ ,  $\text{CHCl}_3$ , 93% ee); HPLC analysis: Daicel Chiralpak IE-3, hexane/2-propanol = 2:1, flow rate = 0.5 mL/min, 254 nm;

retention time: 11.4 min (major) and 12.5 min (minor).  $^1\text{H}$  NMR (400 MHz,  $\text{CDCl}_3$ )  $\delta$  6.66 (d,  $J = 7.3$  Hz, 1H), 6.04 (s, 1H), 5.12 (t,  $J = 1.7$  Hz, 1H), 4.65–4.58 (m, 1H), 3.79 (s, 3H), 1.48 (s, 9H), 1.46 (d,  $J = 7.2$  Hz, 3H);  $^{13}\text{C}$  NMR (100 MHz,  $\text{CDCl}_3$ )  $\delta$  173.1, 163.5, 152.7, 134.4, 98.1, 80.5, 52.7, 48.6, 28.2, 18.3; IR (neat): 3386, 2981, 1731, 1660, 1656, 1627, 1493, 1456, 1367, 1243, 1214, 1155, 1071  $\text{cm}^{-1}$ ; HRMS (EI) calcd for  $\text{C}_{12}\text{H}_{20}\text{N}_2\text{O}_5$ : 272.1372 ( $[\text{M}]^+$ ), found 272.1372.

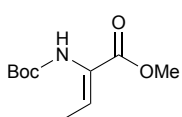

**(Z)-7:1.6** 28% yield (18 mg, 0.084 mmol, white solid).  $^1\text{H}$  NMR (400 MHz,  $\text{CDCl}_3$ )  $\delta$  6.68 (q,  $J = 7.1$  Hz, 1H), 5.97 (br, 1H), 3.77 (s, 3H), 1.81 (d,  $J = 7.1$  Hz, 3H), 1.47 (s, 9H);  $^{13}\text{C}$  NMR (100 MHz,  $\text{CDCl}_3$ )  $\delta$  165.3,

153.1, 132.1, 126.6, 80.4, 52.2, 28.1, 14.3; IR (neat): 3040, 2979, 2954, 1707, 1496, 1367, 1273, 1245, 1159, 1047  $\text{cm}^{-1}$ ; HRMS (EI) calcd for  $\text{C}_{10}\text{H}_{17}\text{NO}_4$ : 215.1158 ( $[\text{M}]^+$ ), found 215.1159.

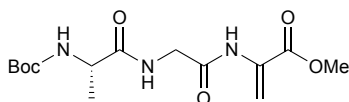

**9**: 43% yield (42 mg, 0.13 mmol, white solid).  $[\alpha]_{\text{D}}^{24} -16.7$  ( $c = 1.3$ ,  $\text{CHCl}_3$ , >99% ee); HPLC analysis: Daicel Chiralpak IE-3, hexane/2-propanol = 2:1, flow rate = 0.5

mL/min, 254 nm; retention time: 30.0 min (major) and ~33 min [not detected] (minor).  $^1\text{H}$  NMR (400 MHz,  $\text{CDCl}_3$ )  $\delta$  8.17 (s, 1H), 6.89 (br, 1H), 6.57 (s, 1H), 5.92 (d,  $J = 1.4$  Hz, 1H), 5.00 (br, 1H), 4.29–4.18 (br m, 1H), 4.08 (dd,  $J = 16.9, 5.7$  Hz, 1H), 4.02 (dd,  $J = 16.9, 5.5$  Hz, 1H), 3.85 (s, 3H), 1.45 (s, 9H), 1.40 (d,  $J = 4.6$  Hz, 3H);  $^{13}\text{C}$  NMR (100 MHz,  $\text{CDCl}_3$ )  $\delta$  173.7, 167.7, 164.2, 155.6, 130.7, 109.7, 80.2, 53.0, 50.0, 43.9, 28.2, 18.4; IR (neat): 3310, 2979, 1666, 1516, 1442, 1366, 1323, 1248, 1203, 1164, 731  $\text{cm}^{-1}$ ;

HRMS (EI) calcd for C<sub>14</sub>H<sub>23</sub>N<sub>3</sub>O<sub>6</sub>: 329.1587 ([M]<sup>+</sup>), found 329.1586.

### 3. Preparation and transformations of dehydroalanine derivative **11** (Scheme 4)

A solution of cysteine derivative **10** (0.71 g, 3.0 mmol) in acetonitrile (30 mL) was warmed to 35 °C and stirred for 5 min. Cesium carbonate (0.98 g, 3.0 mmol, 1 equiv) was then added to the warmed solution. The reaction mixture was stirred for 2 hours at 35 °C under open air conditions. After 2 hours, H<sub>2</sub>O (50 mL) was added to the reaction mixture. The reaction products were extracted three times with ethyl acetate (50 mL × 3). The combined ethyl acetate extracts were dried over Na<sub>2</sub>SO<sub>4</sub>. Following filtration to remove Na<sub>2</sub>SO<sub>4</sub>, the filtrate was concentrated. The residue was purified by flash column chromatography on silica gel (hexane/ethyl acetate = 100:1–20:1 as the eluent) to afford dehydroalanine derivative **11** in 58% yield (0.35 g, 1.7 mmol, colorless viscous oil).

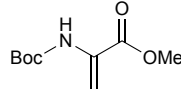 **11**:<sup>1-4</sup>, 58% yield (0.35 g, 1.7 mmol, colorless viscous oil). <sup>1</sup>H NMR (400 MHz, CDCl<sub>3</sub>) δ 7.02 (br, 1H), 6.16 (s, 1H), 5.73 (d, *J* = 1.6 Hz, 1H), 3.83 (s, 3H), 1.49 (s, 9H); <sup>13</sup>C NMR (100 MHz, CDCl<sub>3</sub>) δ 164.4, 152.5, 131.2, 105.1, 80.7, 52.8, 28.2; IR (neat): 3422, 2980, 1715, 1508, 1325, 1155, 1066 cm<sup>-1</sup>; HRMS (EI) calcd for C<sub>9</sub>H<sub>15</sub>NO<sub>4</sub>: 201.1001 ([M]<sup>+</sup>), found 201.1001.

To a solution of dehydroalanine derivative **11** (20 mg, 0.10 mmol) in acetone (0.50 mL) was added 0.1M phosphate buffer solution [pH 8.0] (0.50 mL) at room temperature. Phenylselenol (47 mg, 0.30 mmol, 3 equiv) was then added to the solution of **11**. The reaction mixture was warmed to 40 °C and stirred for 24 hours at 40 °C. After 24 hours, saturated aqueous NH<sub>4</sub>Cl (5 mL) was added to the reaction mixture. The reaction products were extracted three times with ethyl acetate (5 mL × 3). The combined ethyl acetate extracts were dried over Na<sub>2</sub>SO<sub>4</sub>. Following filtration to remove Na<sub>2</sub>SO<sub>4</sub>, the filtrate was concentrated. The residue was purified by flash column chromatography on silica gel (hexane/ethyl acetate = 50:1–10:1 as the eluent) to afford selenocysteine derivative **12** in 89% yield (32 mg, 0.089 mmol, white solid).

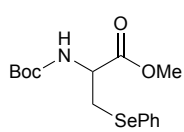

**12**:<sup>10-13</sup> 89% yield (32 mg, 0.089 mmol, white solid). <sup>1</sup>H NMR (400 MHz, CDCl<sub>3</sub>) δ 7.57–7.52 (m, 2H), 7.28–7.24 (m, 3H), 5.35 (br d, *J* = 7.5 Hz, 1H), 4.69–4.64 (br m, 1H), 3.49 (s, 3H), 3.33 (d, *J* = 4.8 Hz, 2H), 1.42 (s, 9H); <sup>13</sup>C NMR (100 MHz, CDCl<sub>3</sub>) δ 171.1, 154.9, 133.7, 129.1, 128.8, 127.5, 80.0, 53.2, 52.2, 30.6, 28.2; IR (neat): 3363, 2978, 1746, 1713, 1501, 1366, 1215, 1165, 739 cm<sup>-1</sup>; HRMS (FAB) calcd for C<sub>15</sub>H<sub>21</sub>NO<sub>4</sub>Se: 359.0636 ([M]<sup>+</sup>), found 359.0636.

To a solution of dehydroalanine derivative **11** (20 mg, 0.10 mmol) in acetone (0.50 mL) was added 0.1M phosphate buffer solution [pH 8.0] (0.50 mL) at room temperature. Propargylamine (6.1 mg, 0.11 mmol, 1.1 equiv) was then added to the solution of **11**. The reaction mixture was warmed to 35 °C and stirred for 48 hours at 35 °C. After 48 hours, the reaction mixture was concentrated. The resulting residue was purified by flash column chromatography on silica gel (dichloromethane/methanol = 100:1–50:1 as the eluent) to afford amino acid product **13** in 55% yield (14 mg, 0.055 mmol, white solid).

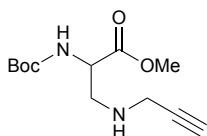

**13**:<sup>14</sup> 55% yield (14 mg, 0.055 mmol, white solid). <sup>1</sup>H NMR (400 MHz, CDCl<sub>3</sub>) δ 5.40 (br, 1H), 4.40 (br, 1H), 3.77 (s, 3H), 3.47–3.37 (m, 2H), 3.10 (dd, *J* = 11.9, 4.8 Hz, 1H), 3.02 (dd, *J* = 12.3, 4.8 Hz, 1H), 2.22 (t, *J* = 2.4 Hz, 1H), 1.45 (s, 9H); <sup>13</sup>C NMR (100 MHz, CDCl<sub>3</sub>) δ 172.2, 155.5, 81.5, 80.0, 71.7, 53.5, 52.5, 49.5, 38.1, 28.3; IR (neat): 3300, 2979, 2932, 1743, 1706, 1366, 1250, 1207, 1162 cm<sup>-1</sup>; HRMS (EI) calcd for C<sub>12</sub>H<sub>21</sub>N<sub>2</sub>O<sub>4</sub>: 257.1501 ([M+H]<sup>+</sup>), found 257.1503.

To a solution of dehydroalanine derivative **11** (20 mg, 0.10 mmol) in methanol (1.0 mL) was added cysteine derivative **10** (35 mg, 0.15 mmol) and triethylamine (15 mg, 0.15 mmol) at room temperature. The reaction mixture was stirred for 2 hours at room temperature. After 2 hours, the reaction mixture was concentrated. The resulting residue was purified by flash column chromatography on silica gel (hexane/ethyl acetate = 20:1–1:1 as the eluent) to afford lanthionine derivative **14** in >99% yield (43 mg, 0.099 mmol, white solid).

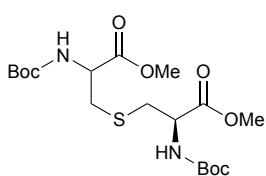

**14**:<sup>15-17</sup> >99% yield (43 mg, 0.099 mmol, white solid). <sup>1</sup>H NMR (400 MHz, CDCl<sub>3</sub>) δ 5.50–5.00 (br m, 2H), 4.65–4.27 (br m, 2H), 3.77 (s, 6H), 3.18–2.91 (m, 4H), 1.45 (s, 18H); <sup>13</sup>C NMR (100 MHz, CDCl<sub>3</sub>) δ 171.2, 155.1, 80.2, 53.23 & 53.16, 52.6, 35.3 & 35.2, 28.2; IR (neat): 3372, 2978, 1700, 1501, 1366, 1248, 1213, 1160, 730 cm<sup>-1</sup>; HRMS (EI) calcd for C<sub>18</sub>H<sub>33</sub>N<sub>2</sub>O<sub>8</sub>S: 437.1958 ([M+H]<sup>+</sup>), found 437.1958.

To a solution of dehydroalanine derivative **11** (20 mg, 0.10 mmol) in acetone (0.50 mL) was added 0.1M phosphate buffer solution [pH 8.0] (0.50 mL) at room temperature. Glutathione derivative **15** (48 mg, 0.11 mmol, 1.1 equiv) was then added to the solution of **11**. The reaction mixture was warmed to 35 °C and stirred for 7 hours at 35 °C. After 7 hours, H<sub>2</sub>O (2 mL) was added to the reaction mixture. The reaction products were extracted three times with ethyl acetate (5 mL × 3). The combined ethyl acetate extracts were dried over Na<sub>2</sub>SO<sub>4</sub>. Following filtration to remove Na<sub>2</sub>SO<sub>4</sub>, the filtrate was concentrated. The residue was purified by flash column chromatography on silica gel (dichloromethane/methanol = 100:1–25:1 as the eluent) to afford peptide **16** in 87% yield (56 mg, 0.087 mmol, white solid).

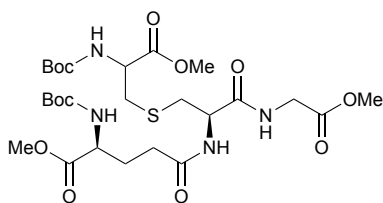

**16**: 87% yield (56 mg, 0.087 mmol, white solid). <sup>1</sup>H NMR (400 MHz, CDCl<sub>3</sub>) δ 7.23–6.78 (br m, 2H), 5.58–5.25 (br m, 2H), 4.70–4.35 (br m, 3H), 4.13–3.99 (m, 2H), 3.79–3.75 (m, 9H), 3.09–2.84 (m, 4H), 2.42–2.33 (m, 2H), 2.28–2.15 (br m, 1H), 2.05–1.90 (br m, 1H), 1.45–1.44 (m, 18H); <sup>13</sup>C NMR (100 MHz, CDCl<sub>3</sub>) δ 172.89, 172.86, 172.3, 172.2, 171.6, 171.4, 170.7, 170.51, 170.45, 169.94, 169.89, 155.7, 155.4, 80.4, 80.1, 53.7, 53.2, 52.72, 52.67, 52.5, 52.4, 52.3, 52.0, 51.9, 41.25, 41.18, 35.6, 35.3, 34.6, 34.4, 32.1, 31.9, 28.5, 28.3; IR (neat): 3320, 2979, 2955, 1745, 1703, 1653, 1520, 1213, 1167 cm<sup>-1</sup>; HRMS (EI) calcd for C<sub>26</sub>H<sub>45</sub>N<sub>4</sub>O<sub>12</sub>S: 637.2755 ([M+H]<sup>+</sup>), found 637.2756.

## References

1. P. M. T. Ferreira, L. S. Monteiro, G. Pereira, L. Ribeiro, J. Sacramento and L. Silva, *Eur. J. Org. Chem.* 2007, 5934–5949.
2. J. M. Chalker, S. B. Gunnoo, O. Boutureira, S. C. Gerstberger, M. Fernández-González, G. J. L. Bernardes, L. Griffin, H. Hailu, C. J. Schofield and B. G. Davis, *Chem. Sci.*, 2011, **2**, 1666–1676.
3. K. M. Reddy and G. Mugesh, *RSC Adv.*, 2019, **9**, 34–43.
4. H. Wang, J. Zhang and M. Xian, *J. Am. Chem. Soc.*, 2009, **131**, 13238–13239.
5. C. J. Chapman, J. D. Hargrave, G. Bish and C. G. Frost, *Tetrahedron*, 2008, **64**, 9528–9539.
6. R. Ramesh, K. De and S. Chandrasekaran, *Tetrahedron*, 2007, **63**, 10534–10542.
7. C. J. Chapman, A. Matsuno, C. G. Frost and M. C. Willis, *Chem. Commun.*, 2007, 3903–3905.
8. L. Gentilucci, L. Cerisoli, R. De Marco and A. Tolomelli, *Tetrahedron Lett.*, 2010, **51**, 2576–2579.
9. P. J. Knerr and W. A. van der Donk, *J. Am. Chem. Soc.*, 2012, **134**, 7648–7651.
10. A. L. Braga, P. H. Schneider, M. W. Paixão, A. M. Deobald, C. Peppe and D. P. Bottega, *J. Org. Chem.*, 2006, **71**, 4305–4307.
11. Y. Fang, T. Rogge, L. Ackermann, S.-Y. Wang and S.-J. Ji, *Nat. Commun.*, 2018, **9**, 2240.
12. K. M. Reddy and G. Mugesh, *Chem. – Eur. J.*, 2019, **25**, 8875–8883.
13. Z. Yu, Y. Kong, B. Li, S. Su, J. Rao, Y. Gao, T. Tu, H. Chen and K. Liao, *Chem. Commun.*, 2023, **59**, 2935–2938.
14. V. S. Sudhir, N. Y. P. Kumar, R. B. N. Baig and S. Chandrasekaran, *J. Org. Chem.*, 2009, **74**, 7588–7591.
15. C. Dugave and A. Ménez, *Tetrahedron: Asymmetry*, 1997, **8**, 1453–1465.
16. A. P. Galow, F. Rominger and M. Mastalerz, *Eur. J. Org. Chem.*, 2023, **26**, e202201383.
17. J. M. Hammond, M. G. Gardiner and L. R. Malins, *Org. Lett.*, 2023, **25**, 3157–3162.

## NMR Charts

1h:  $^1\text{H}$  and  $^{13}\text{C}$  NMR ( $\text{CDCl}_3$ )

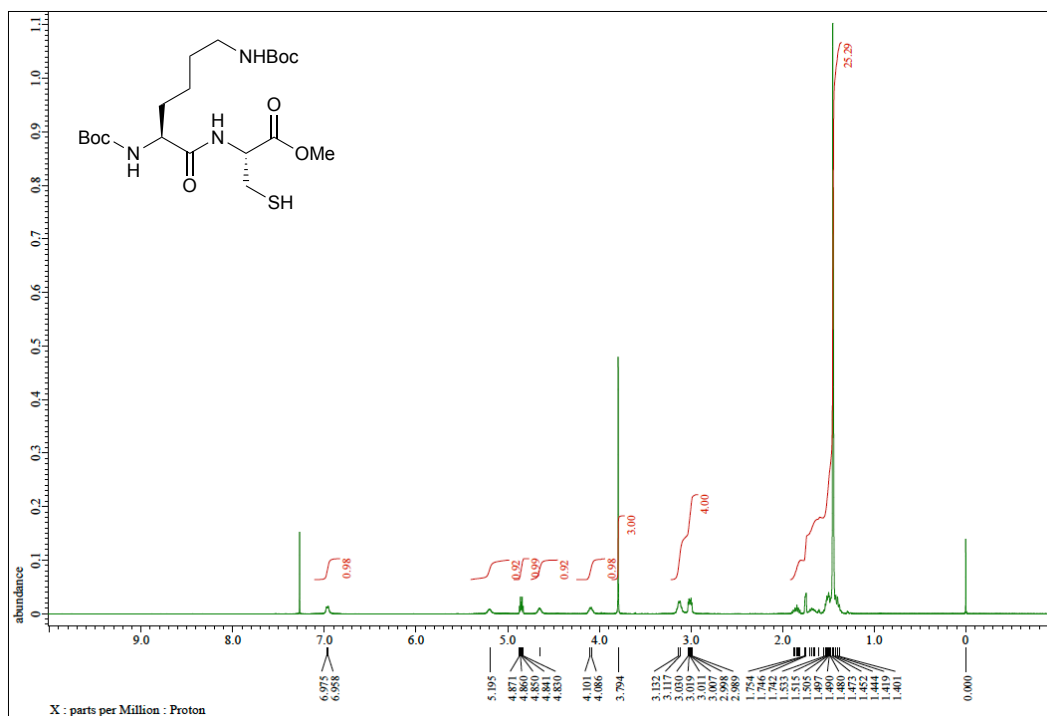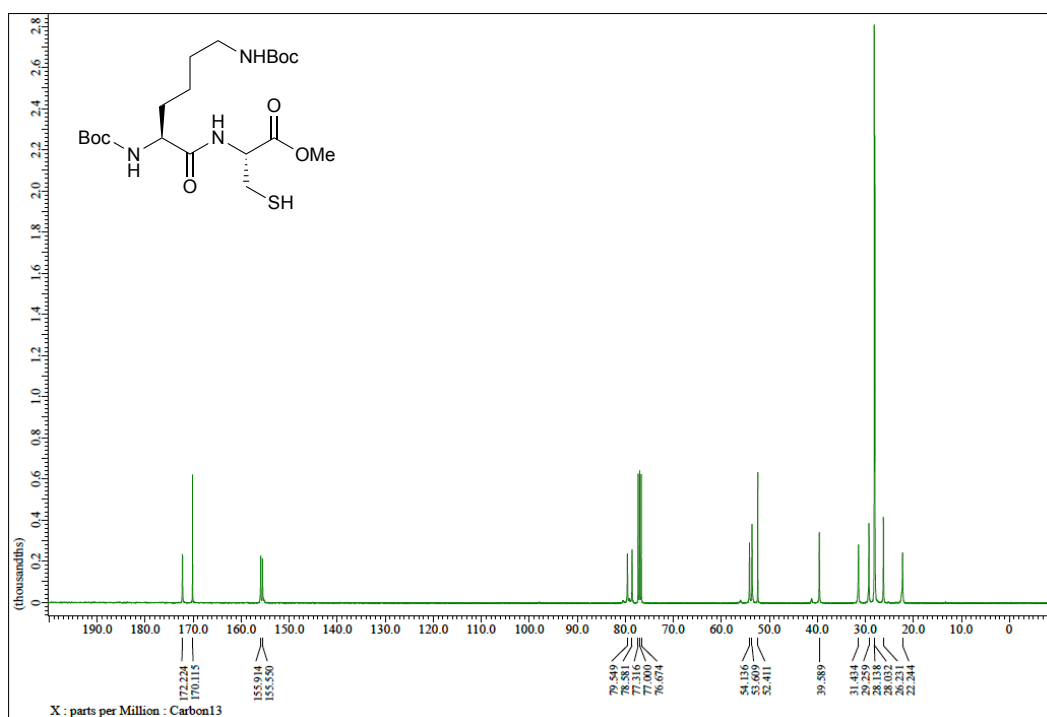

8:  $^1\text{H}$  and  $^{13}\text{C}$  NMR ( $\text{CD}_3\text{OD}$ )

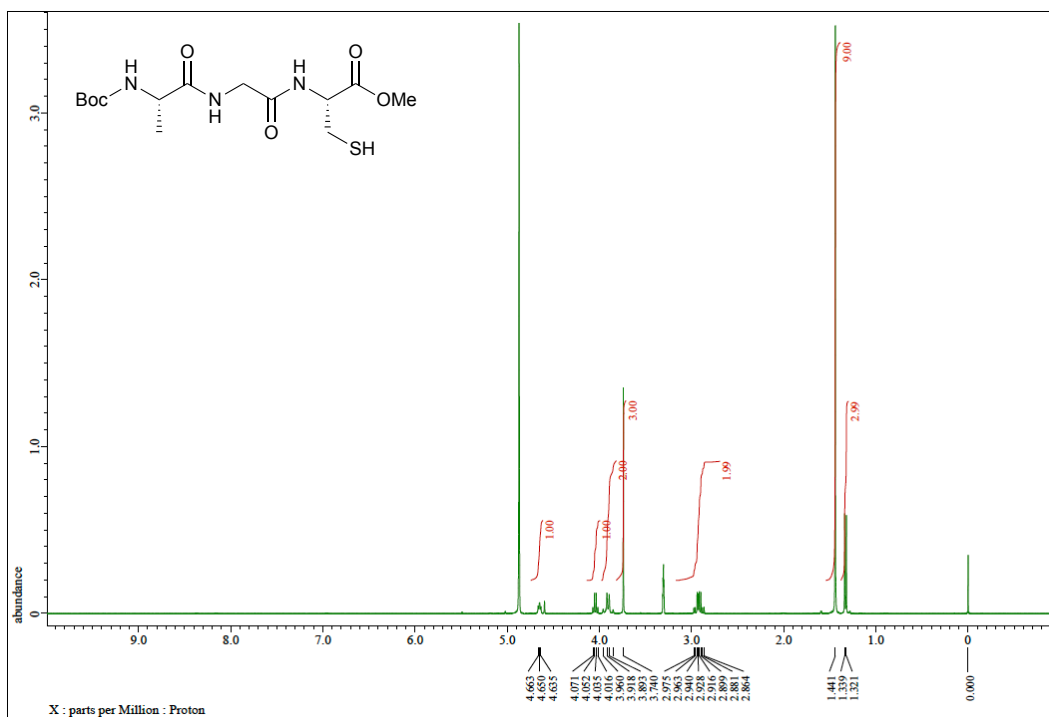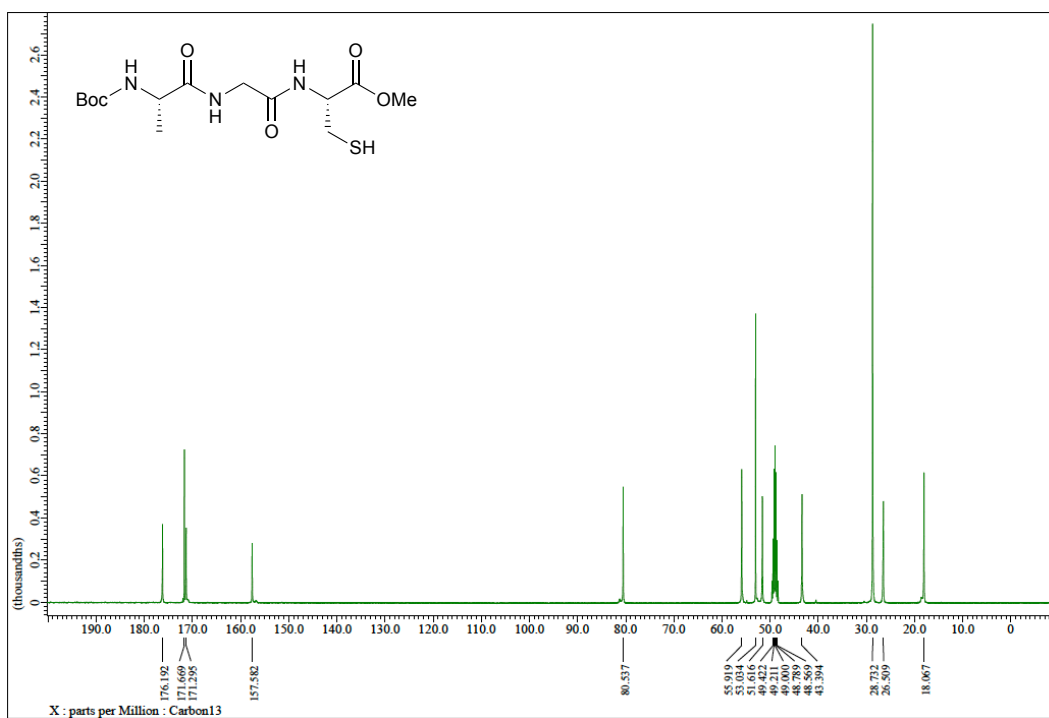



**2a:**  $^1\text{H}$  and  $^{13}\text{C}$  NMR ( $\text{CDCl}_3$ )

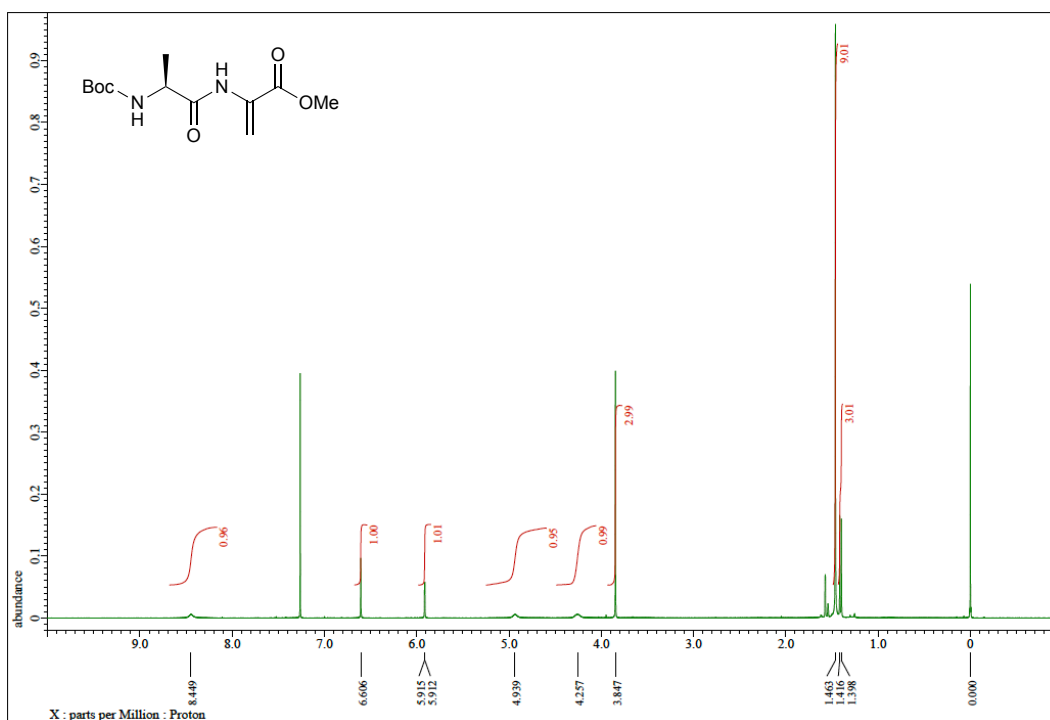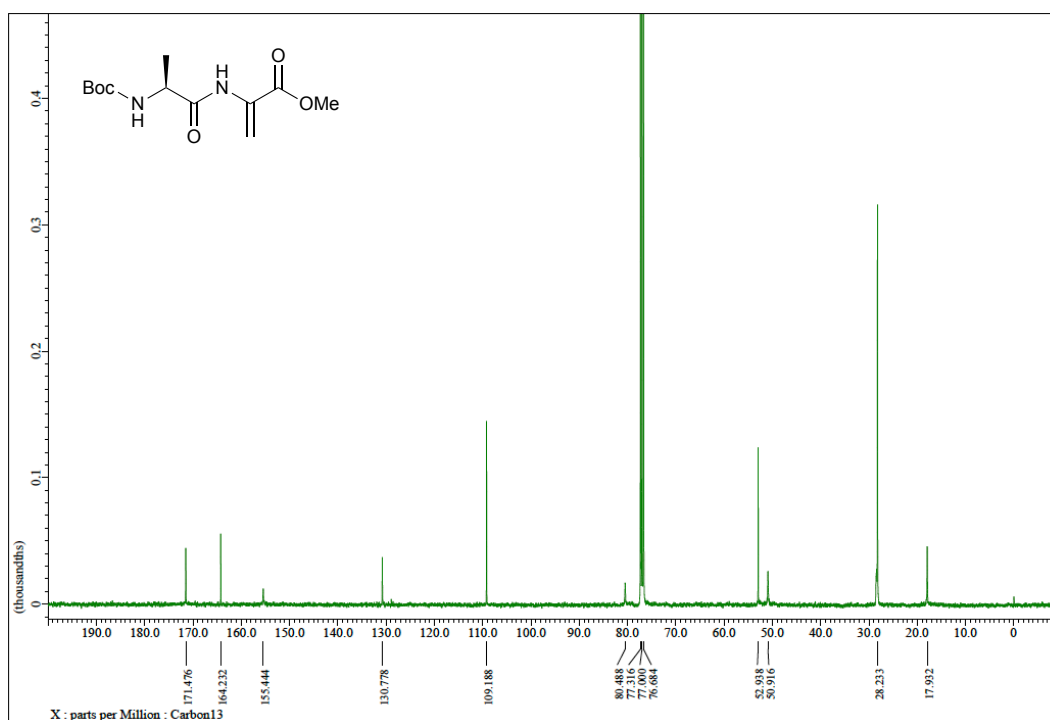

**2b:**  $^1\text{H}$  and  $^{13}\text{C}$  NMR ( $\text{CDCl}_3$ )

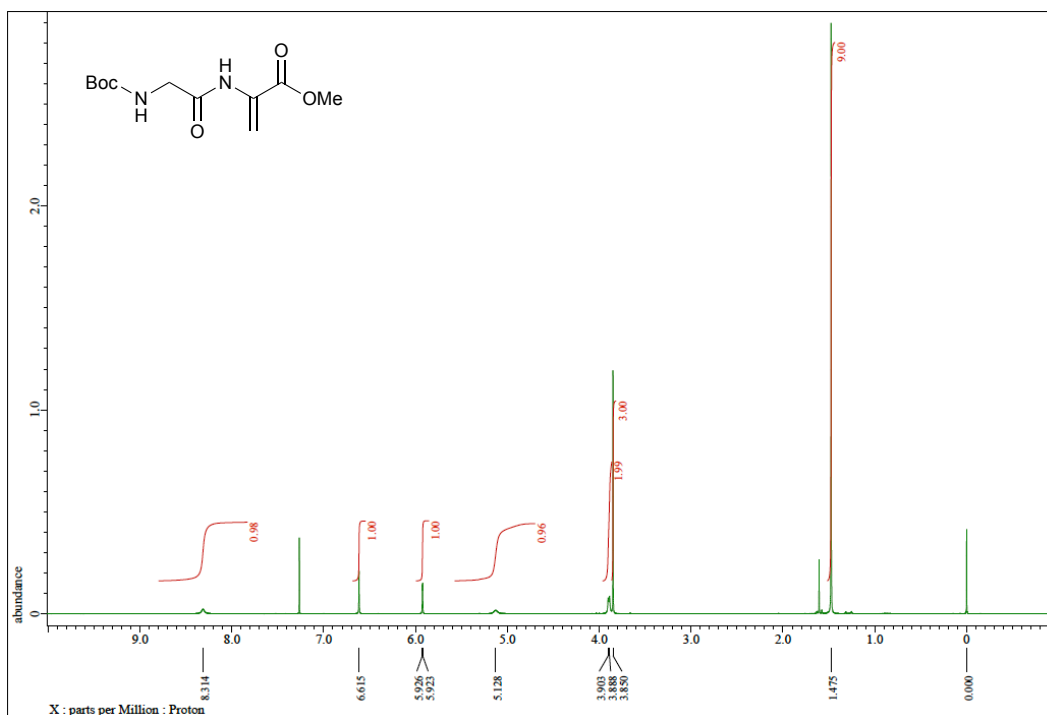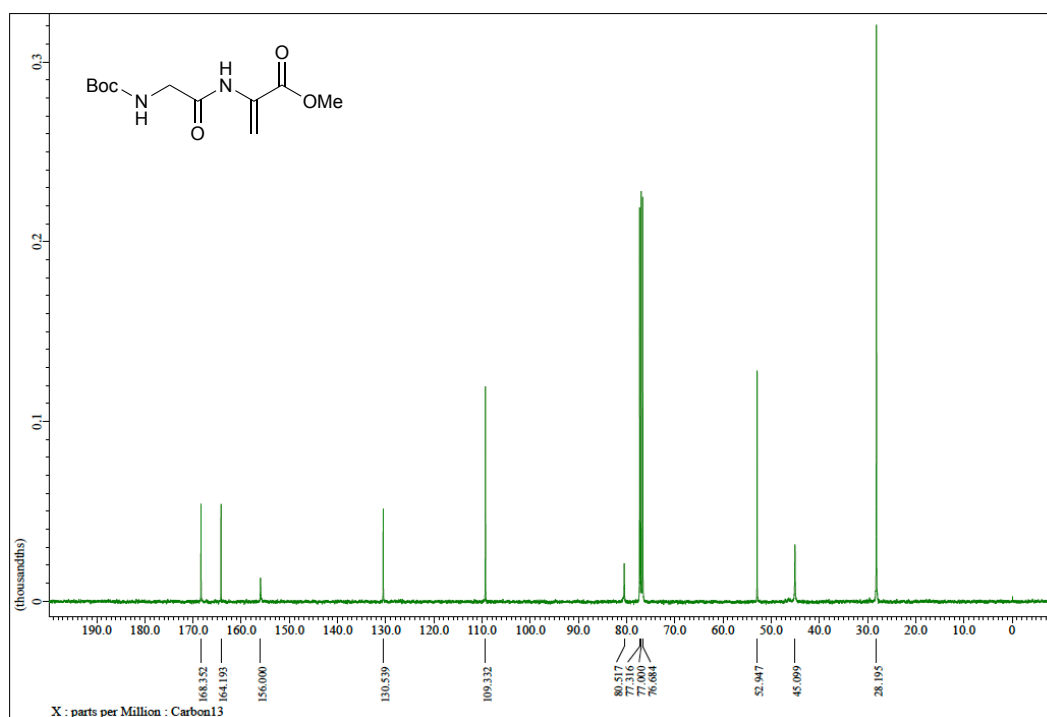

2c:  $^1\text{H}$  and  $^{13}\text{C}$  NMR ( $\text{CDCl}_3$ )

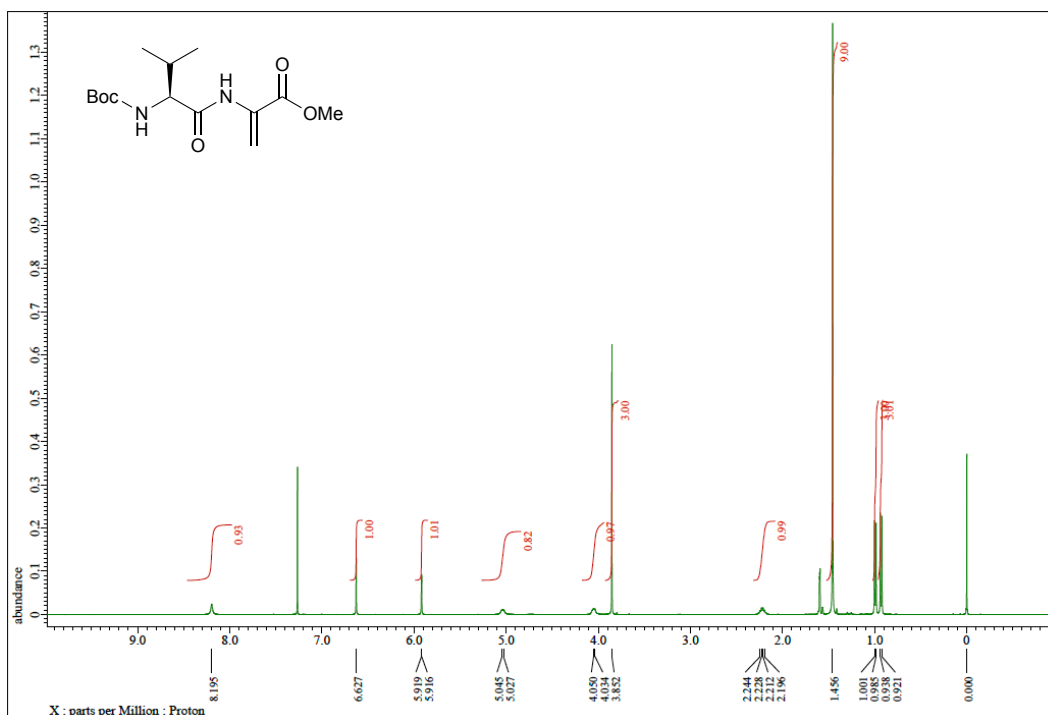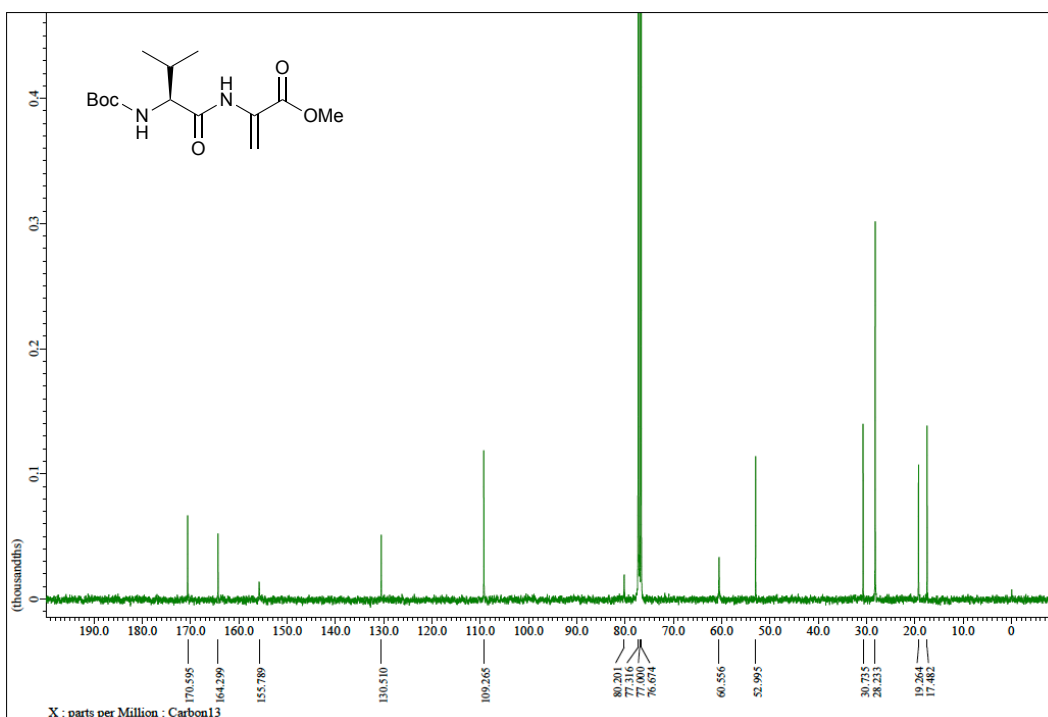

**2d:**  $^1\text{H}$  and  $^{13}\text{C}$  NMR ( $\text{CDCl}_3$ )

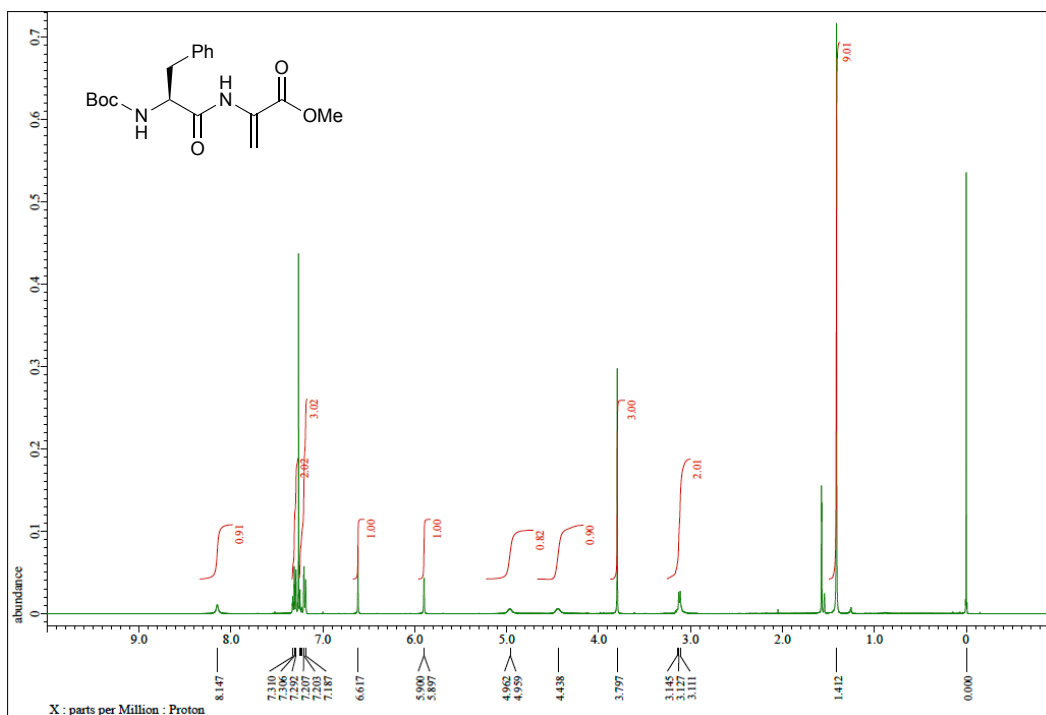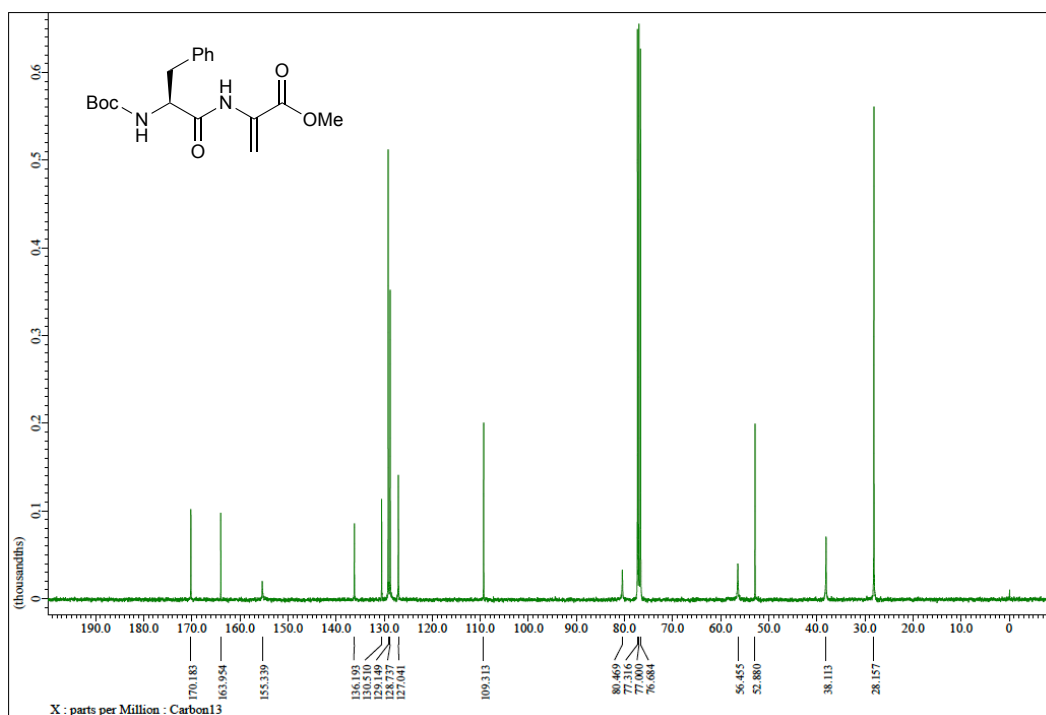

2e:  $^1\text{H}$  and  $^{13}\text{C}$  NMR (DMSO- $d_6$ )

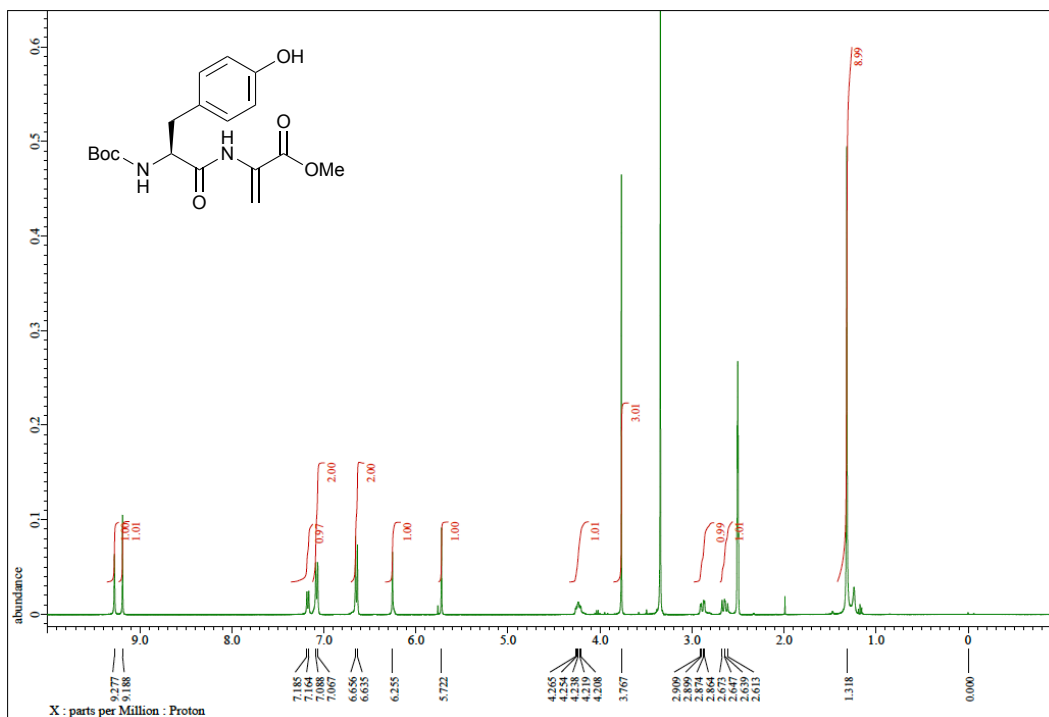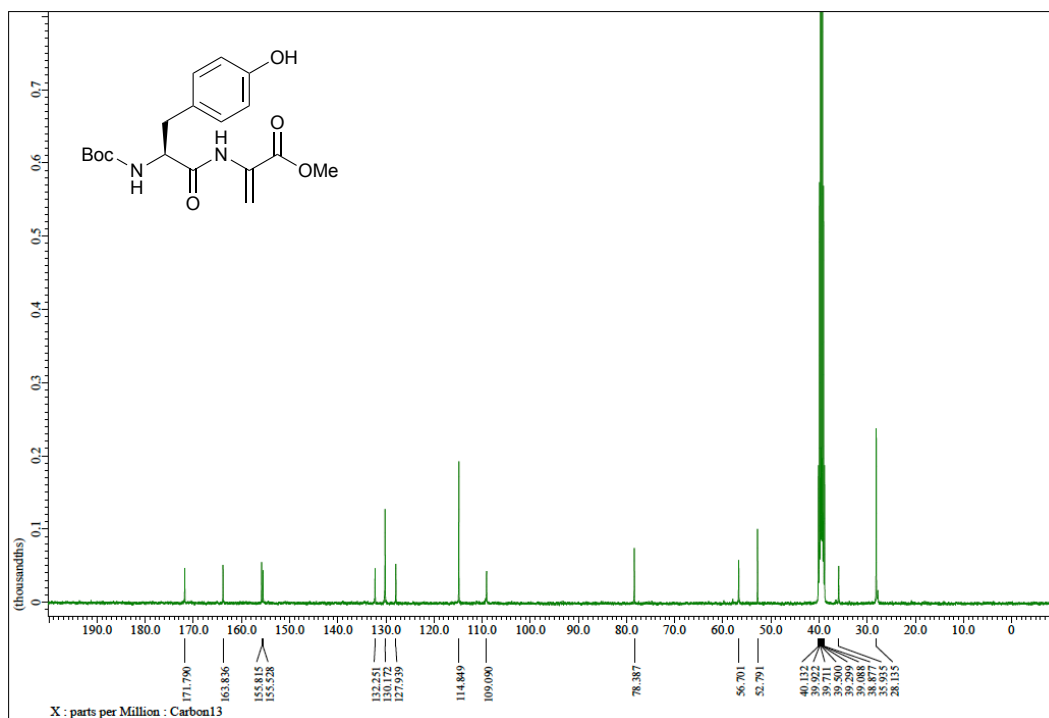

2f:  $^1\text{H}$  and  $^{13}\text{C}$  NMR ( $\text{CDCl}_3$ )

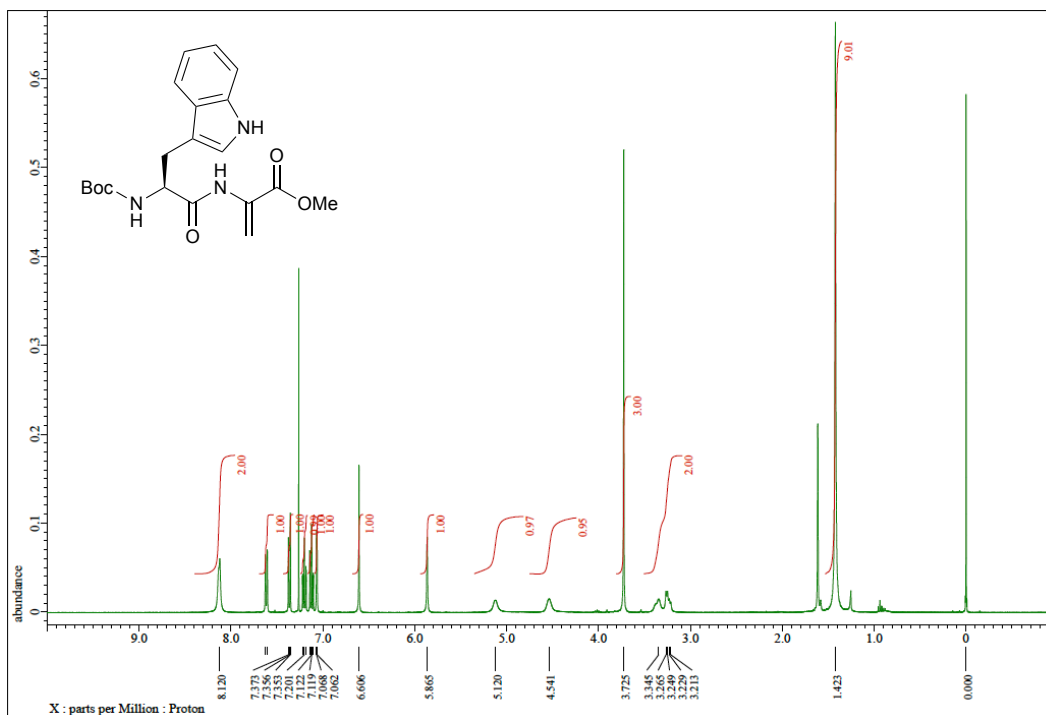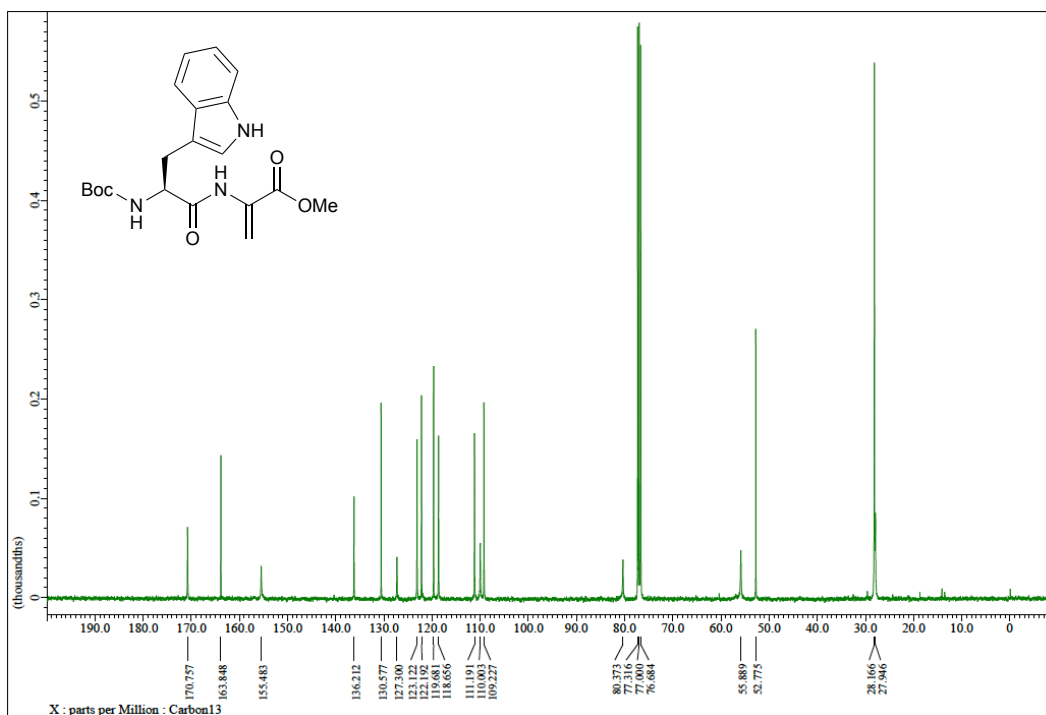

**2g:**  $^1\text{H}$  and  $^{13}\text{C}$  NMR ( $\text{CDCl}_3$ )

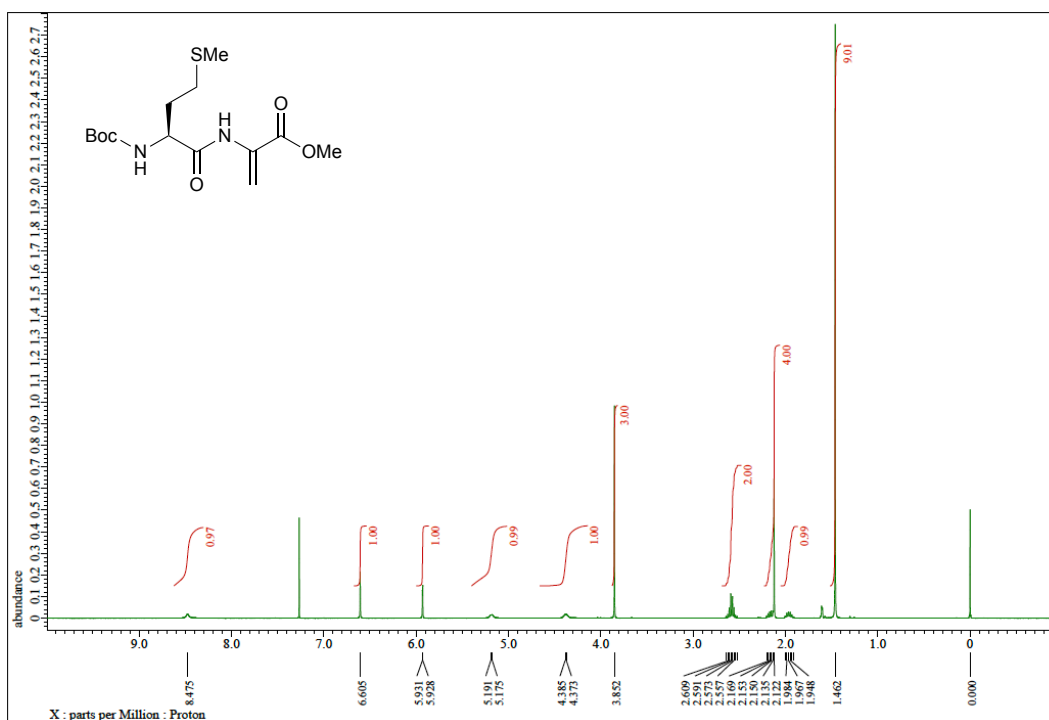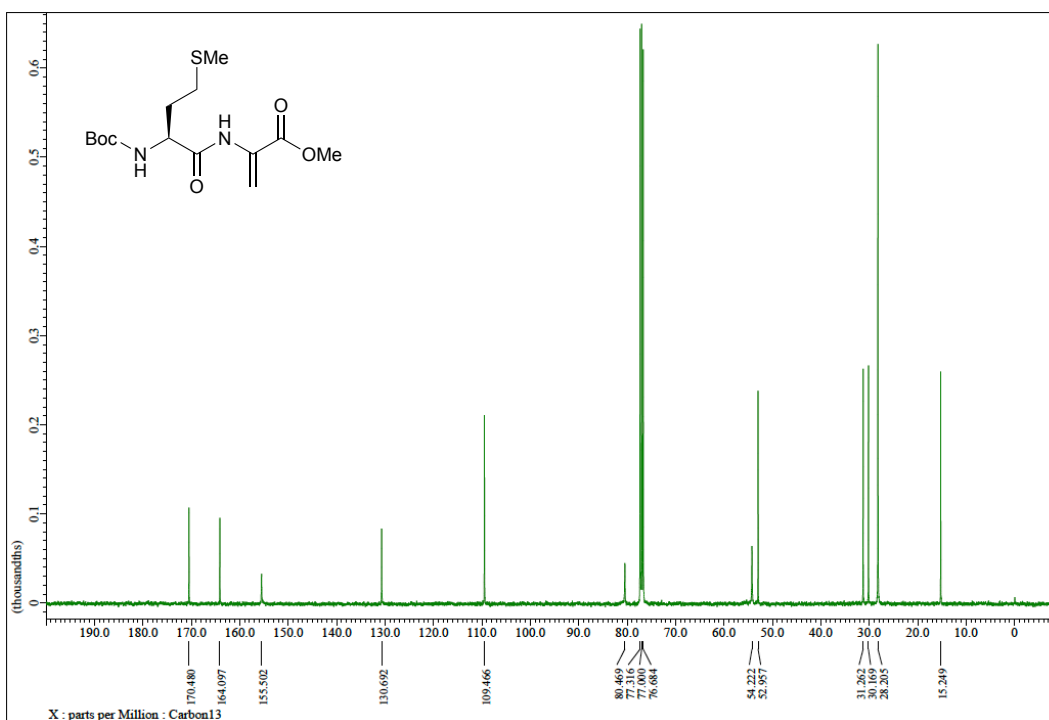

**2h:**  $^1\text{H}$  and  $^{13}\text{C}$  NMR ( $\text{CDCl}_3$ )

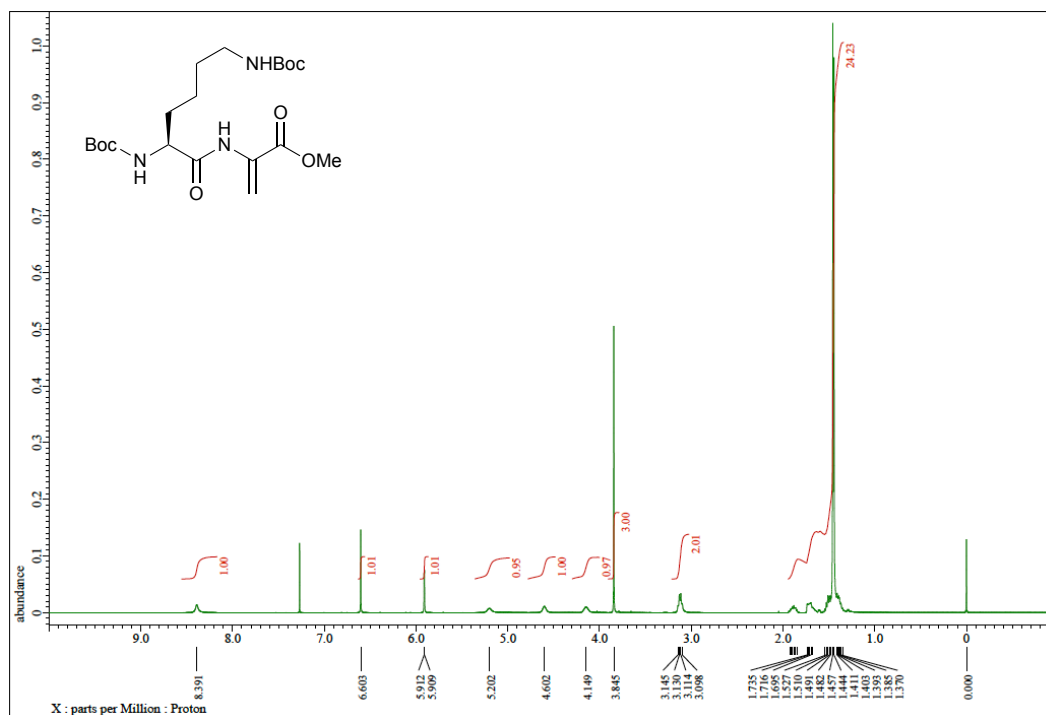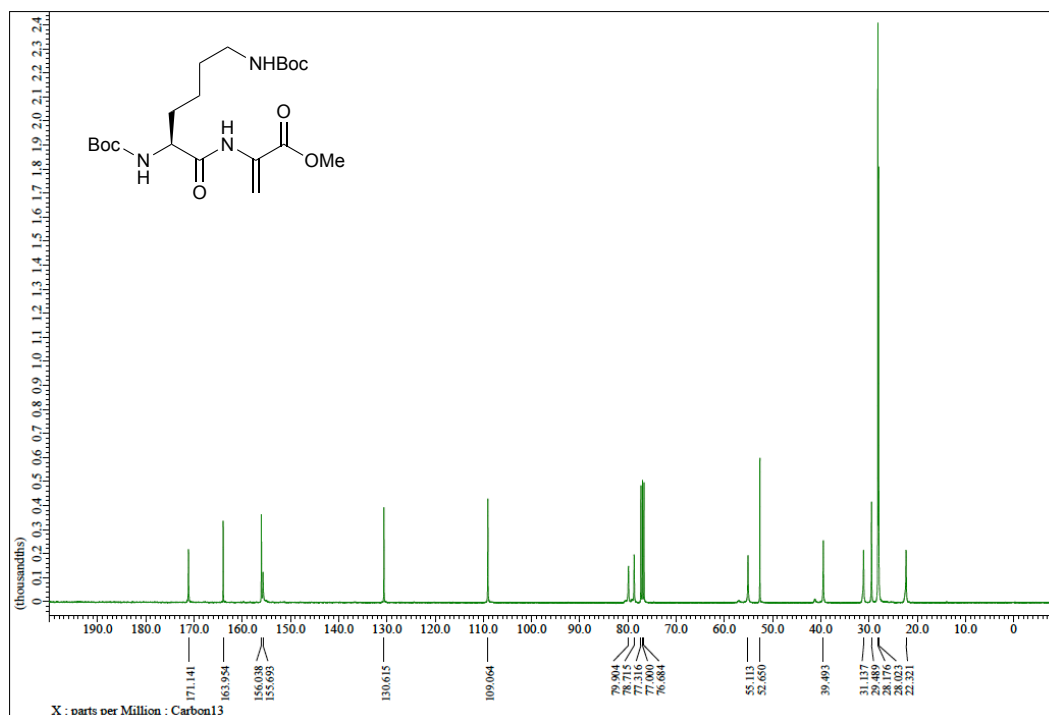



2i:  $^1\text{H}$  and  $^{13}\text{C}$  NMR ( $\text{CDCl}_3$ )

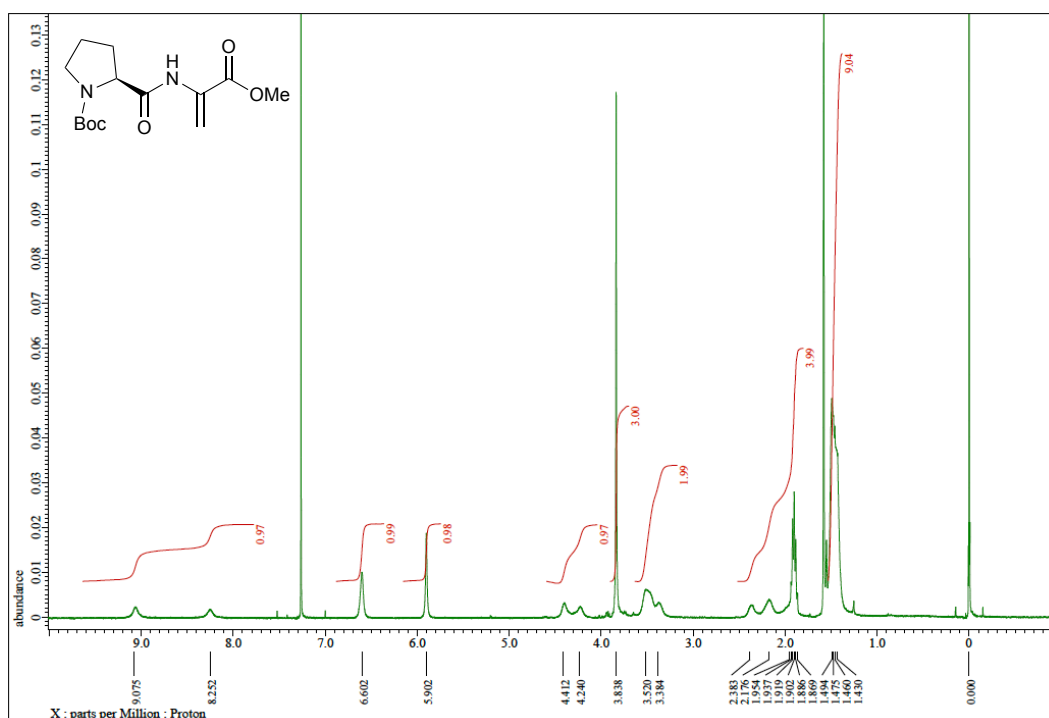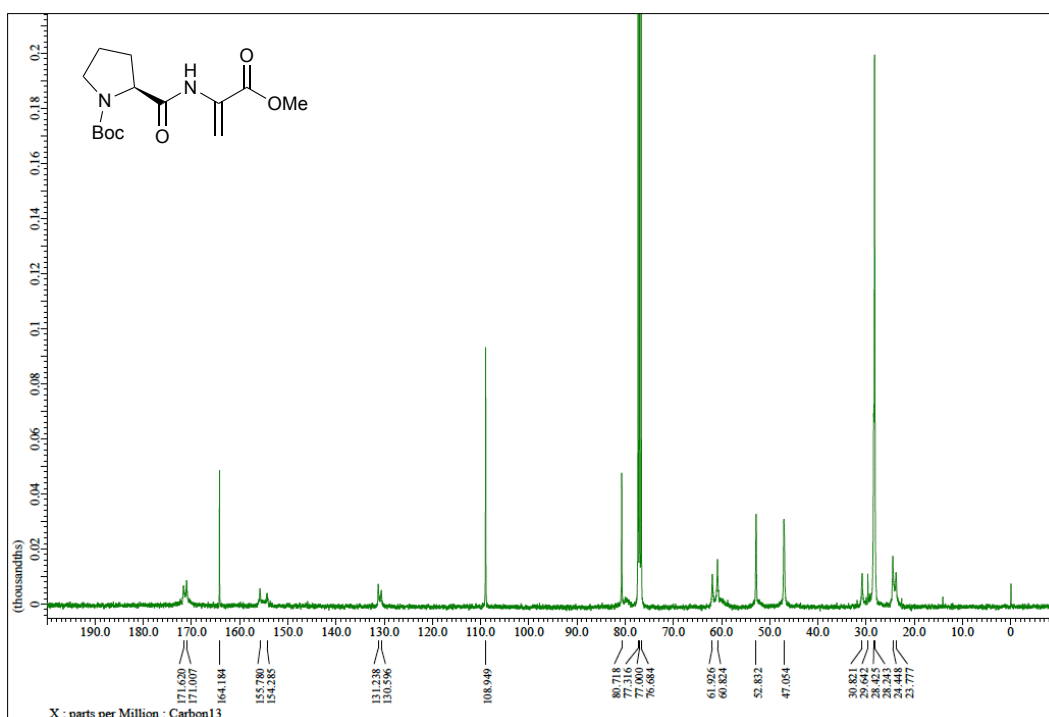

2j:  $^1\text{H}$  and  $^{13}\text{C}$  NMR ( $\text{CDCl}_3$ )

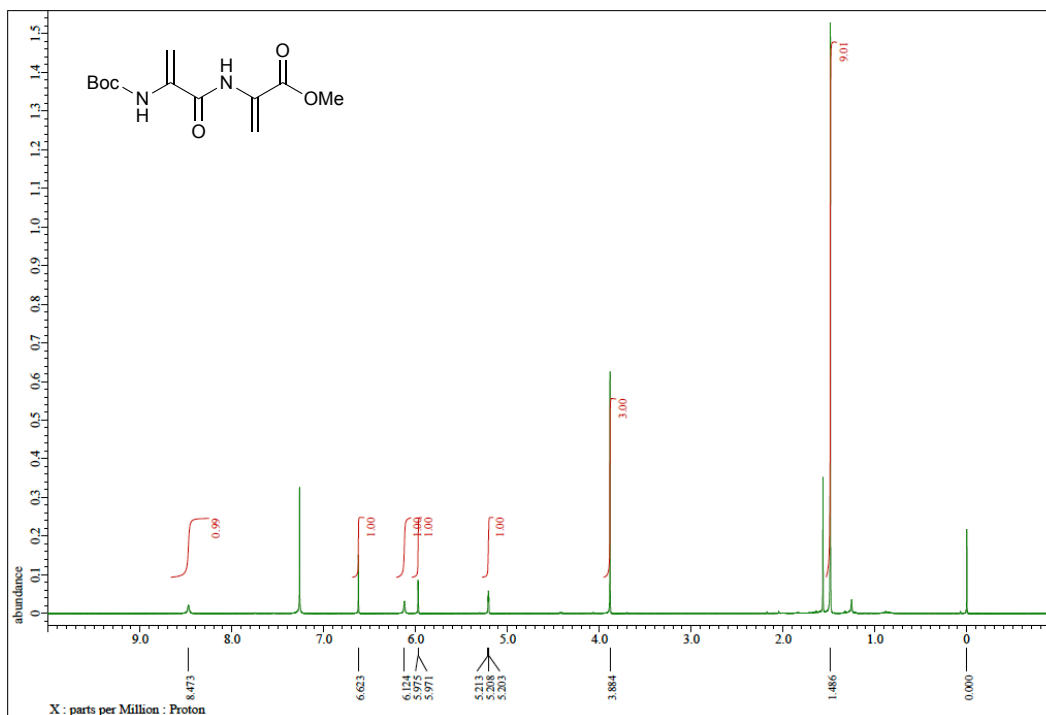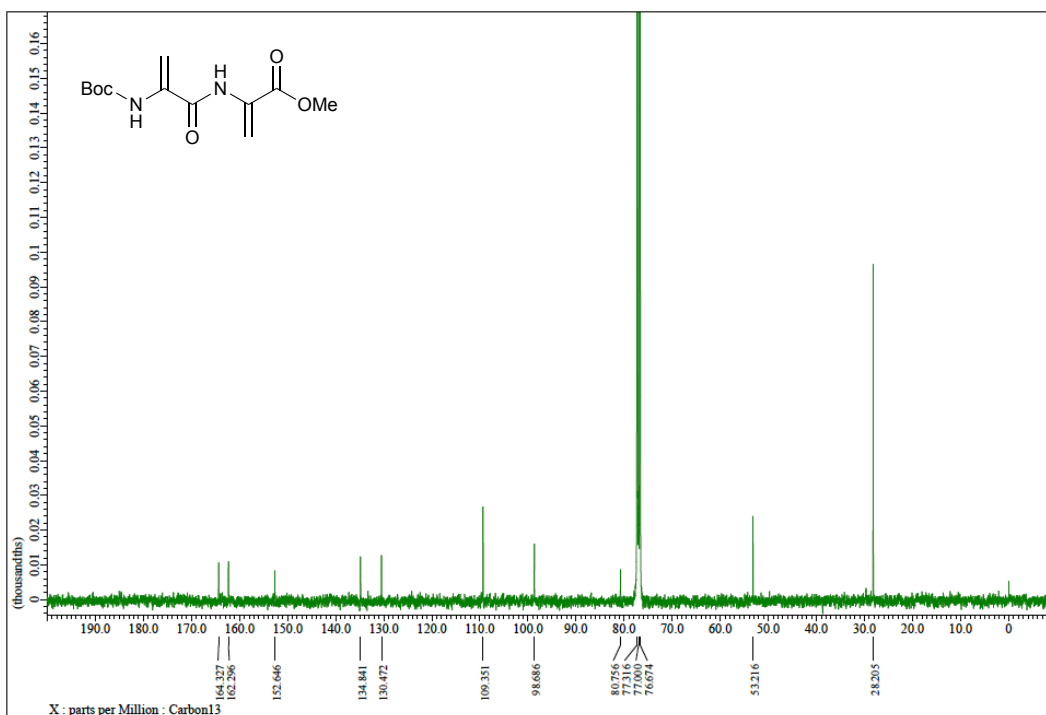

**2k:**  $^1\text{H}$  and  $^{13}\text{C}$  NMR ( $\text{CDCl}_3$ )

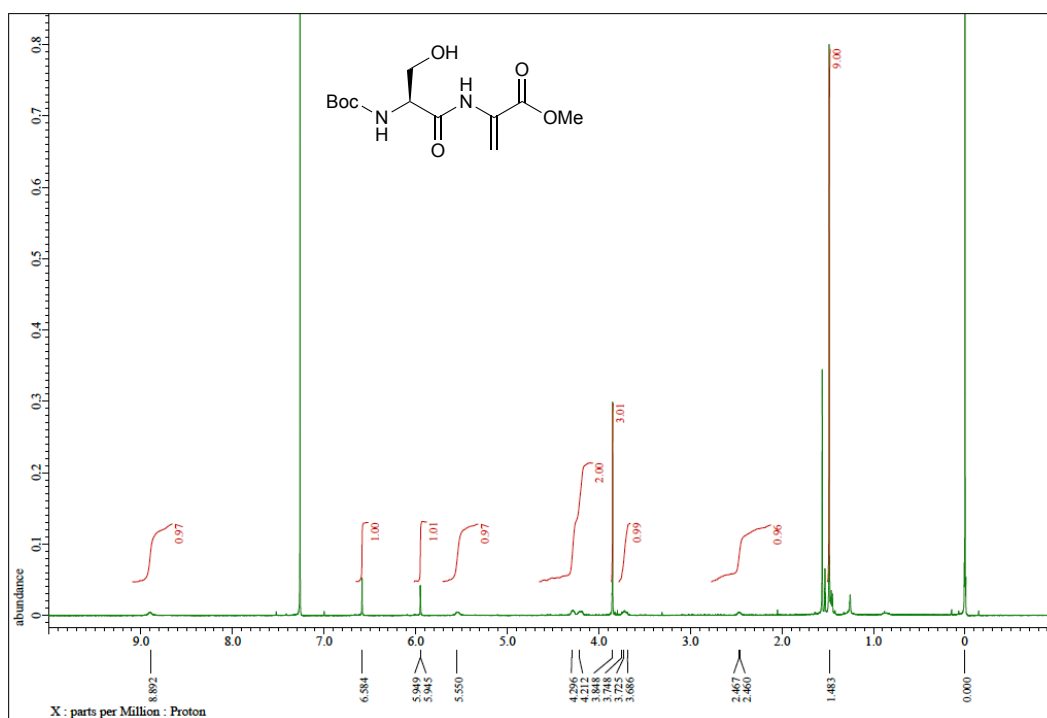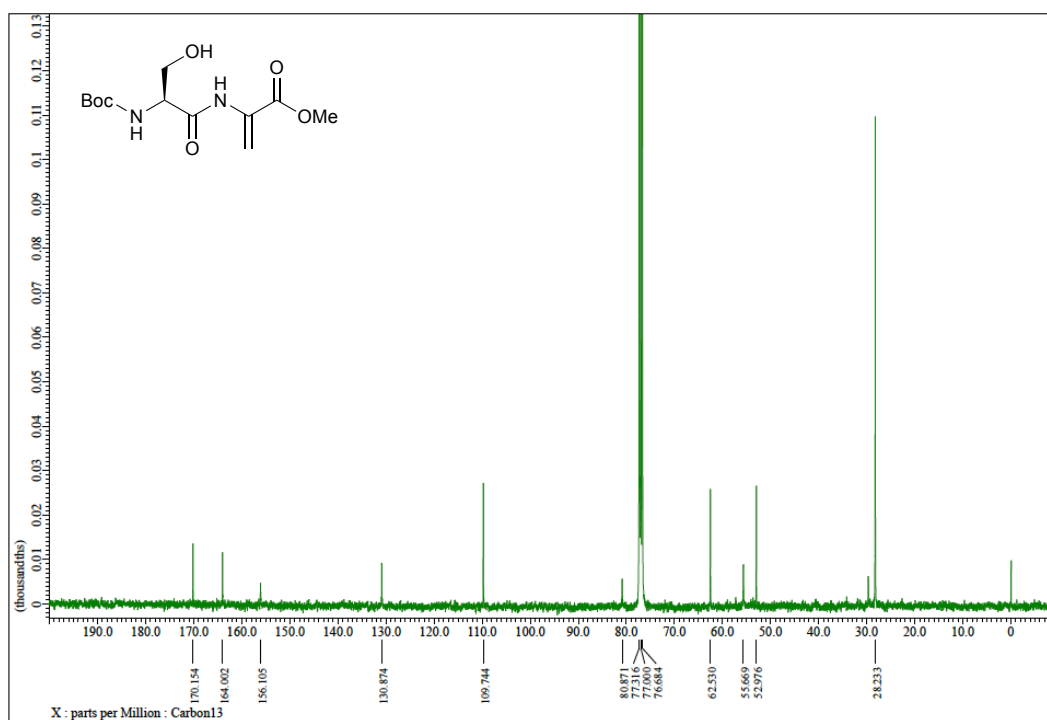

4:  $^1\text{H}$  and  $^{13}\text{C}$  NMR ( $\text{CDCl}_3$ )

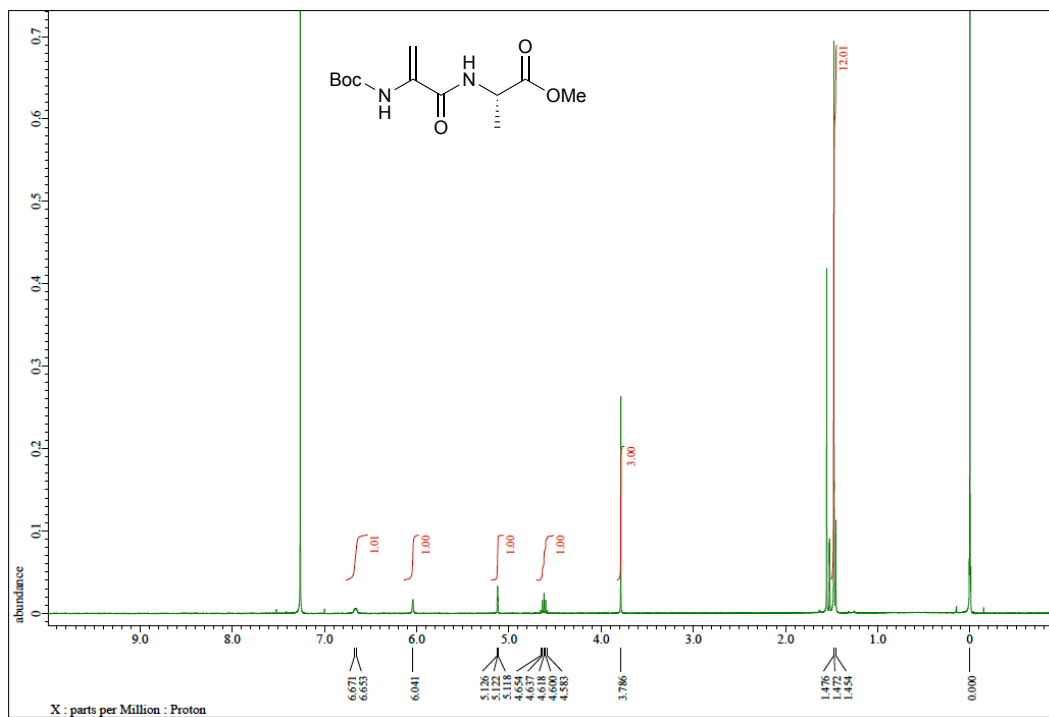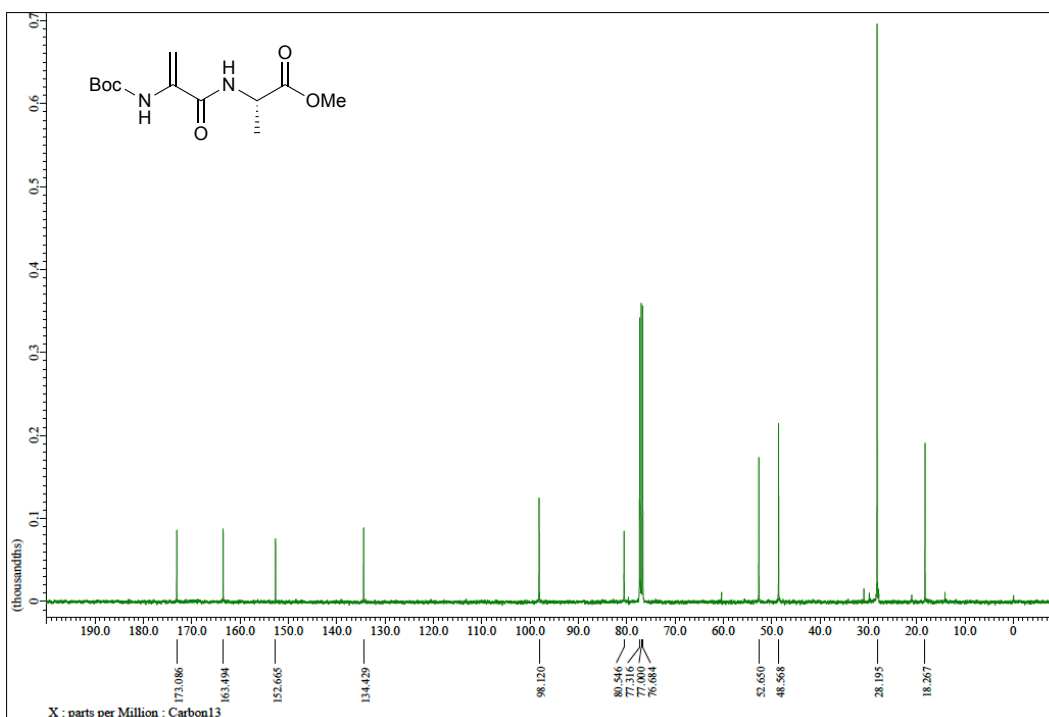

(Z)-7:  $^1\text{H}$  and  $^{13}\text{C}$  NMR ( $\text{CDCl}_3$ )

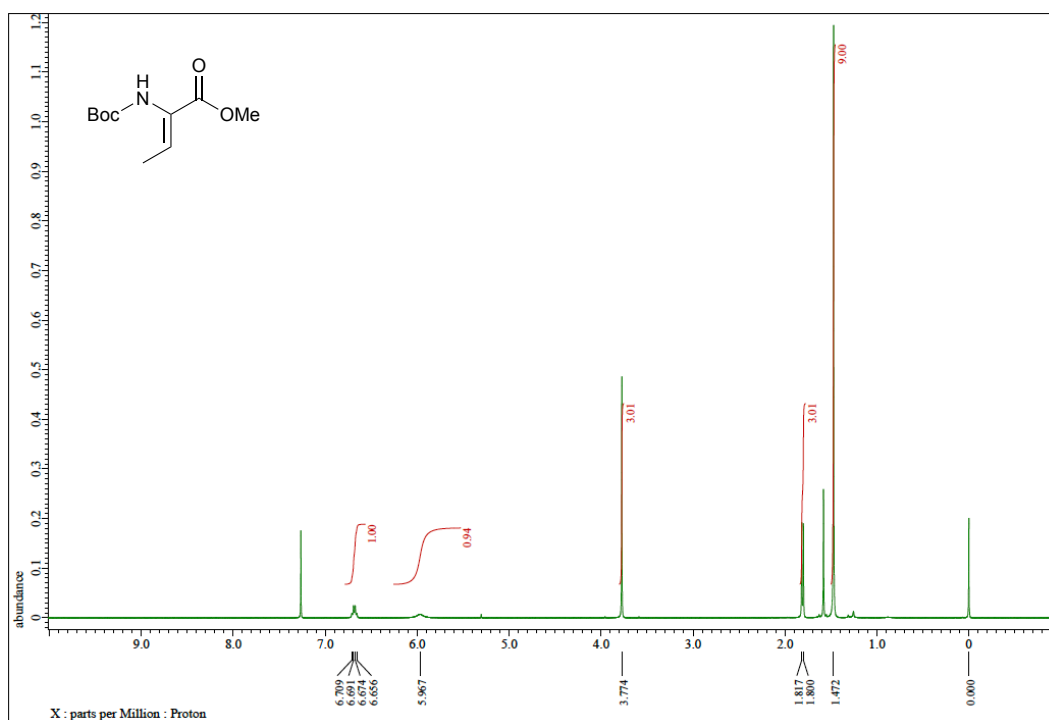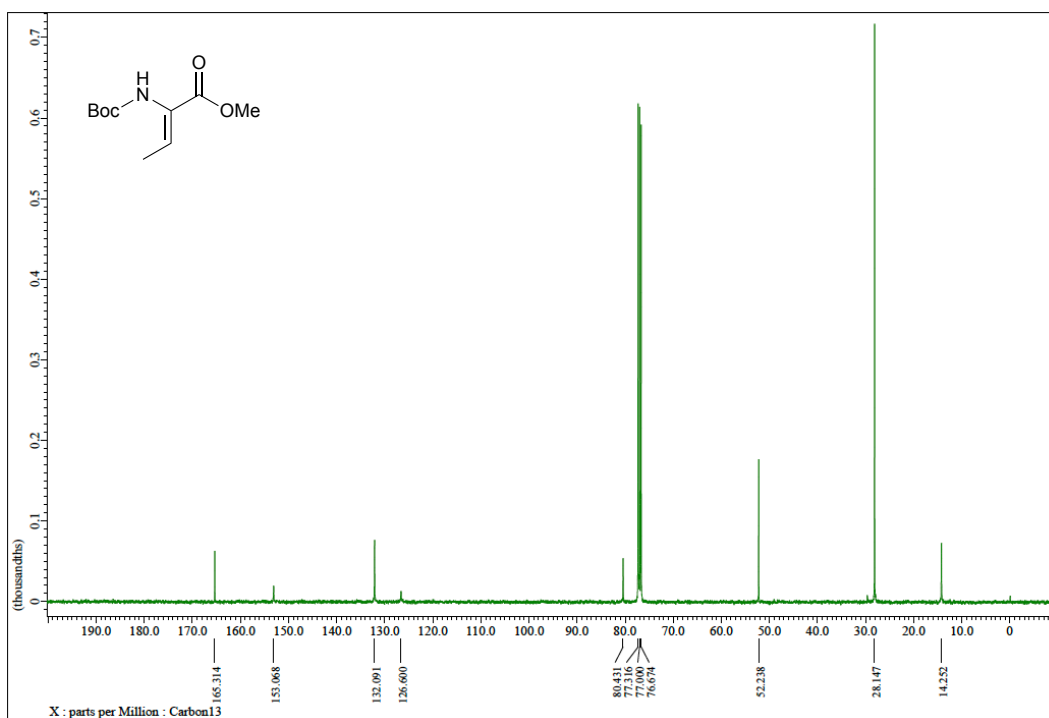

9:  $^1\text{H}$  and  $^{13}\text{C}$  NMR ( $\text{CDCl}_3$ )

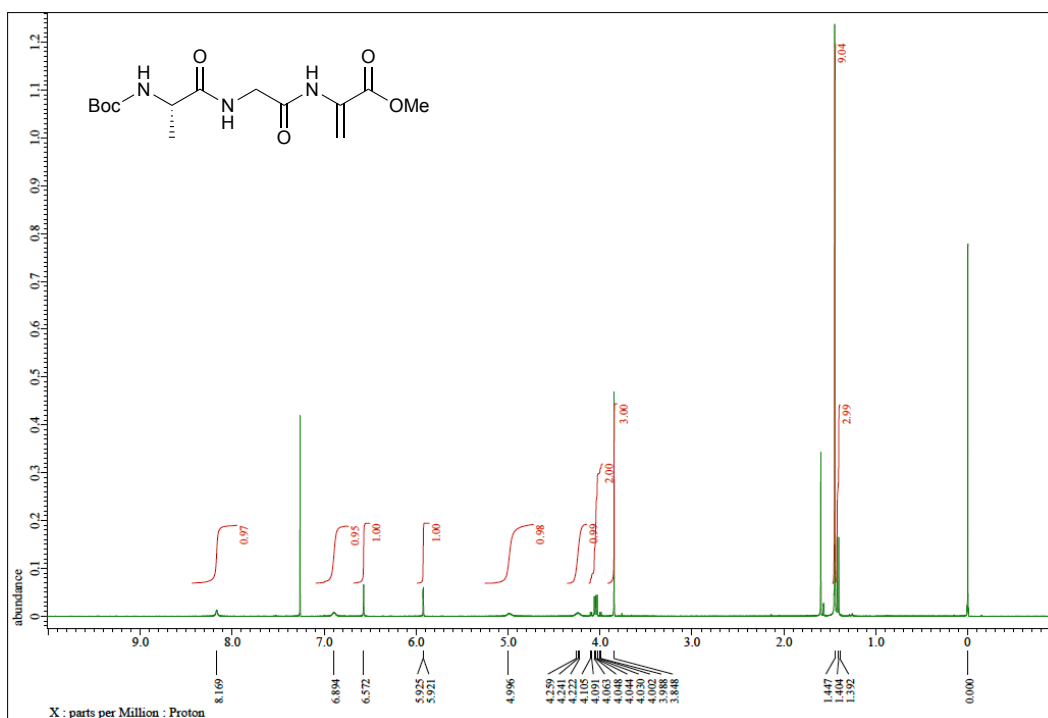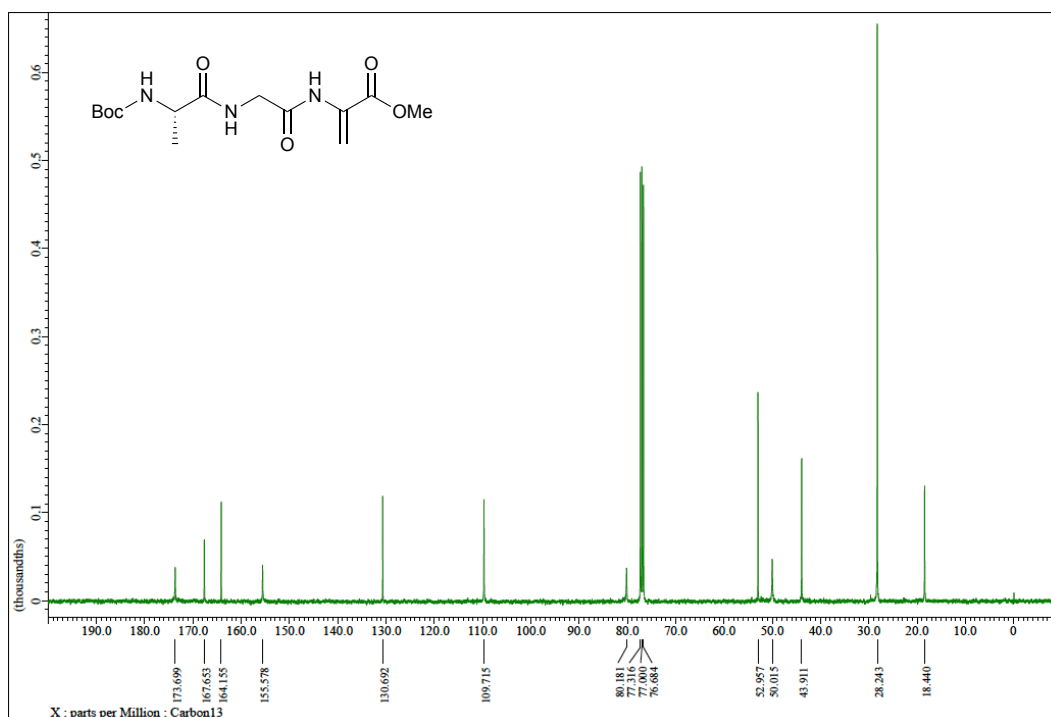

11:  $^1\text{H}$  and  $^{13}\text{C}$  NMR ( $\text{CDCl}_3$ )

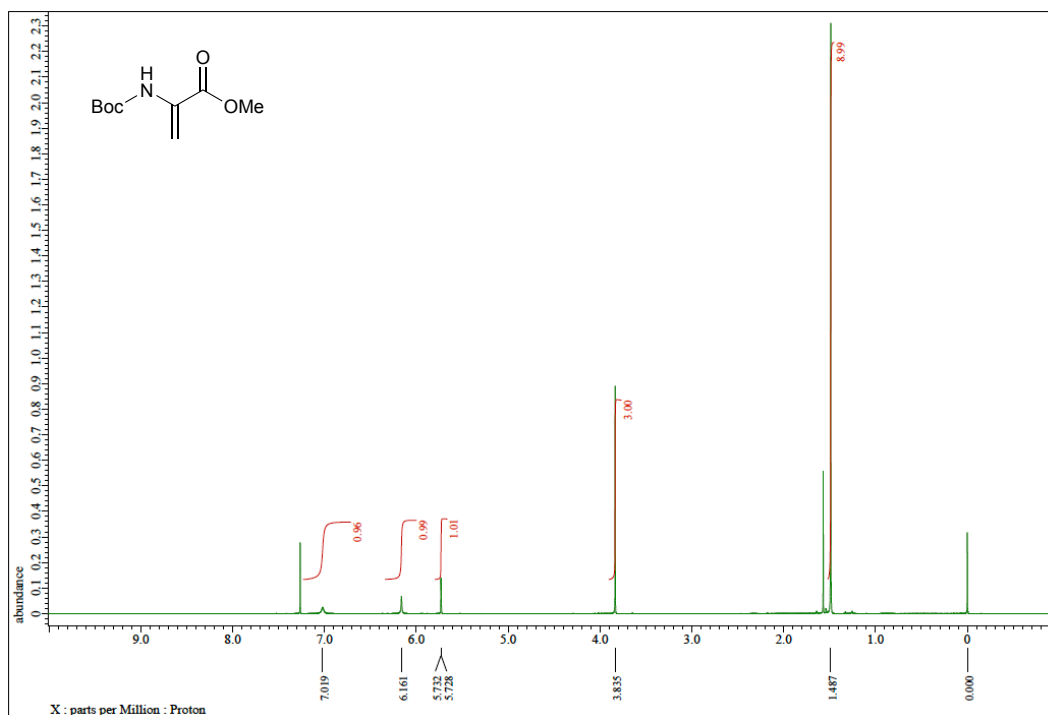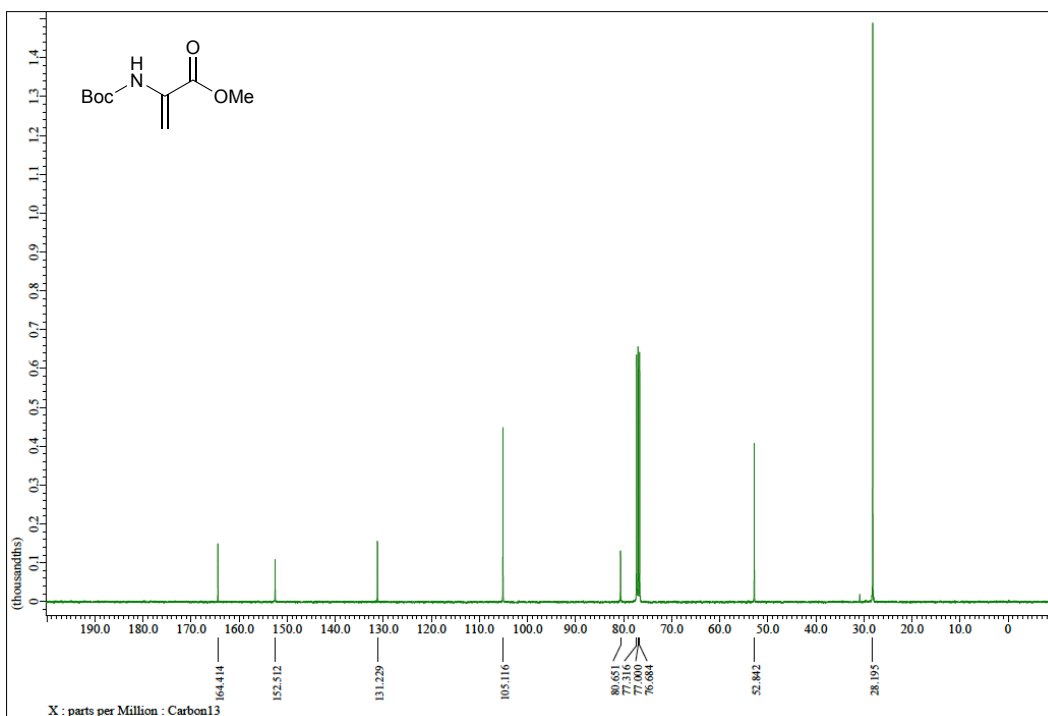

12:  $^1\text{H}$  and  $^{13}\text{C}$  NMR ( $\text{CDCl}_3$ )

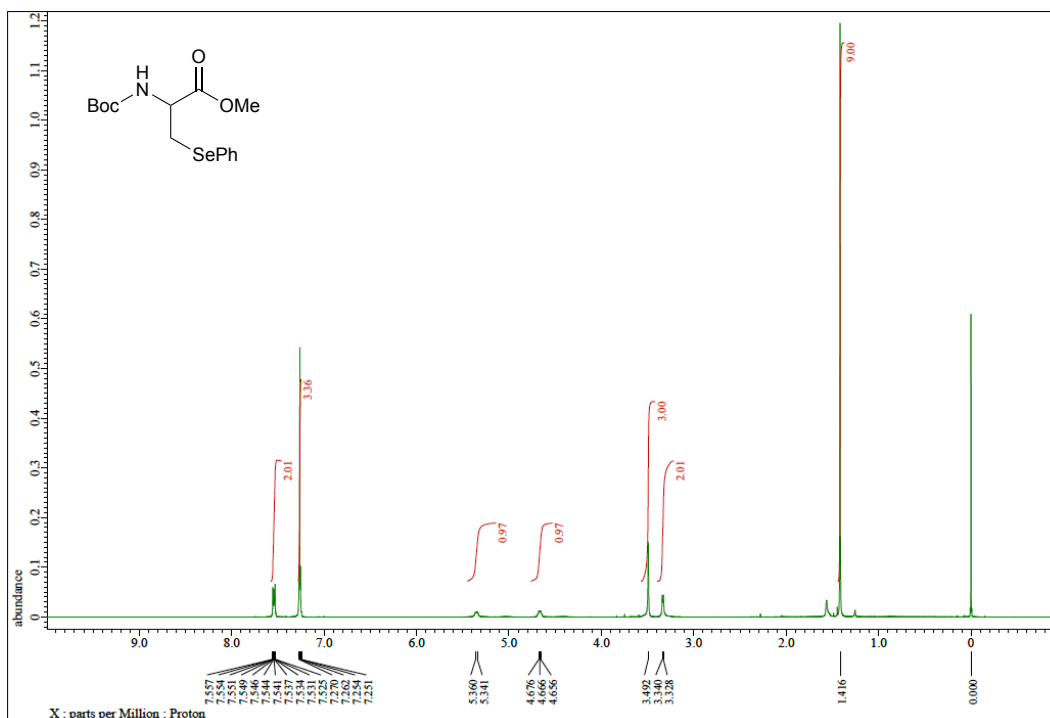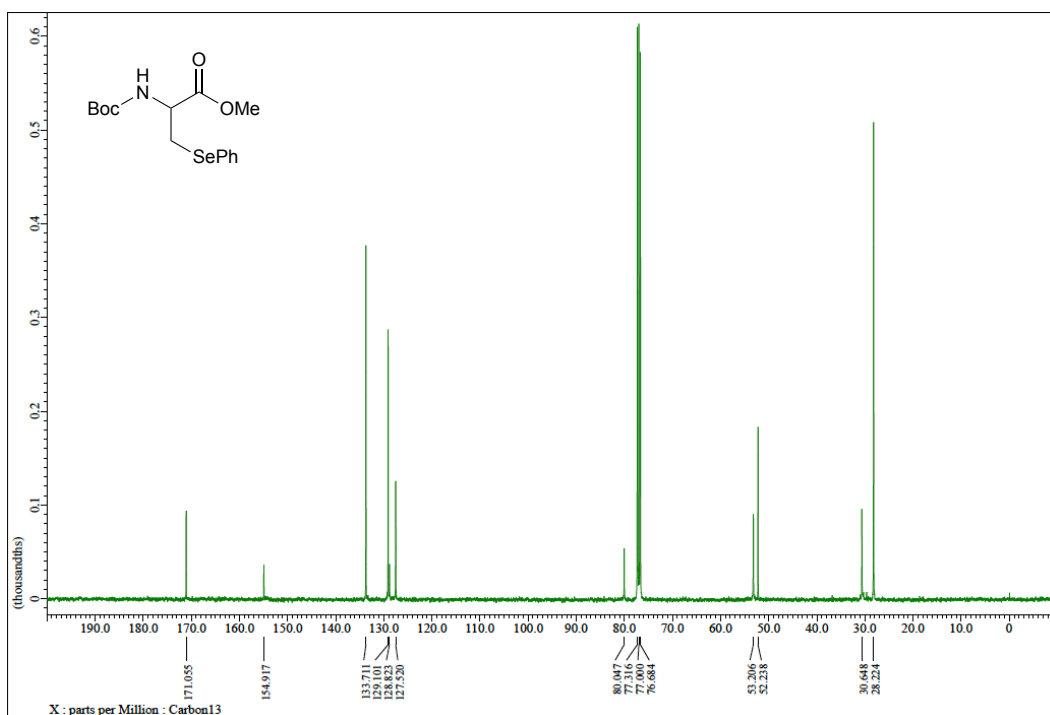



13:  $^1\text{H}$  and  $^{13}\text{C}$  NMR ( $\text{CDCl}_3$ )

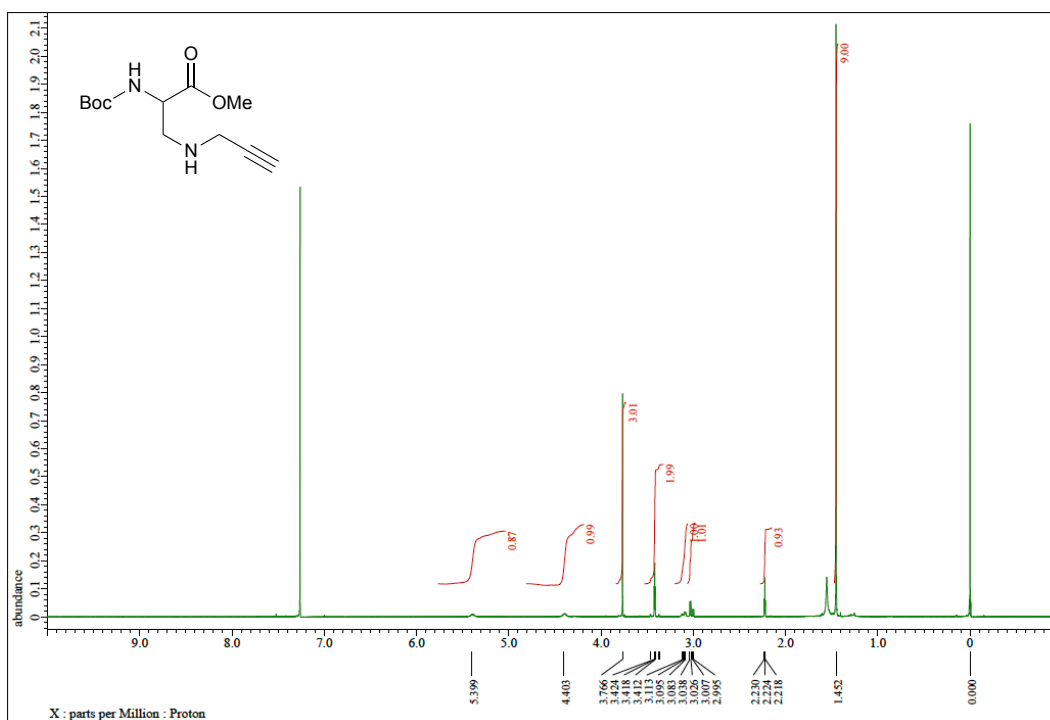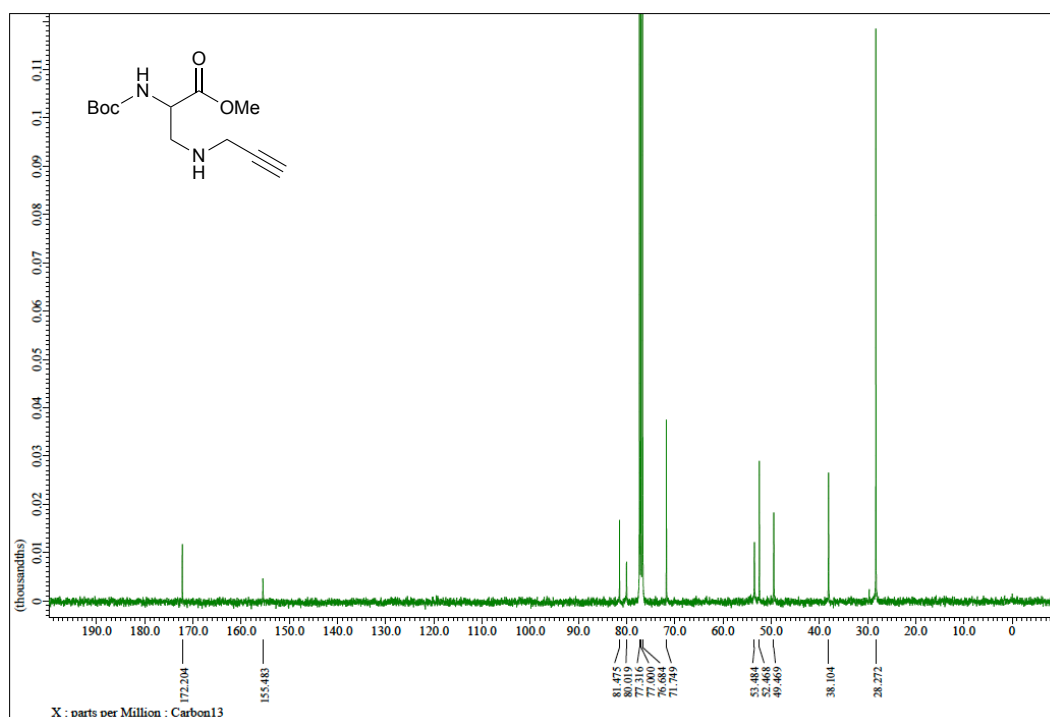

14:  $^1\text{H}$  and  $^{13}\text{C}$  NMR ( $\text{CDCl}_3$ )

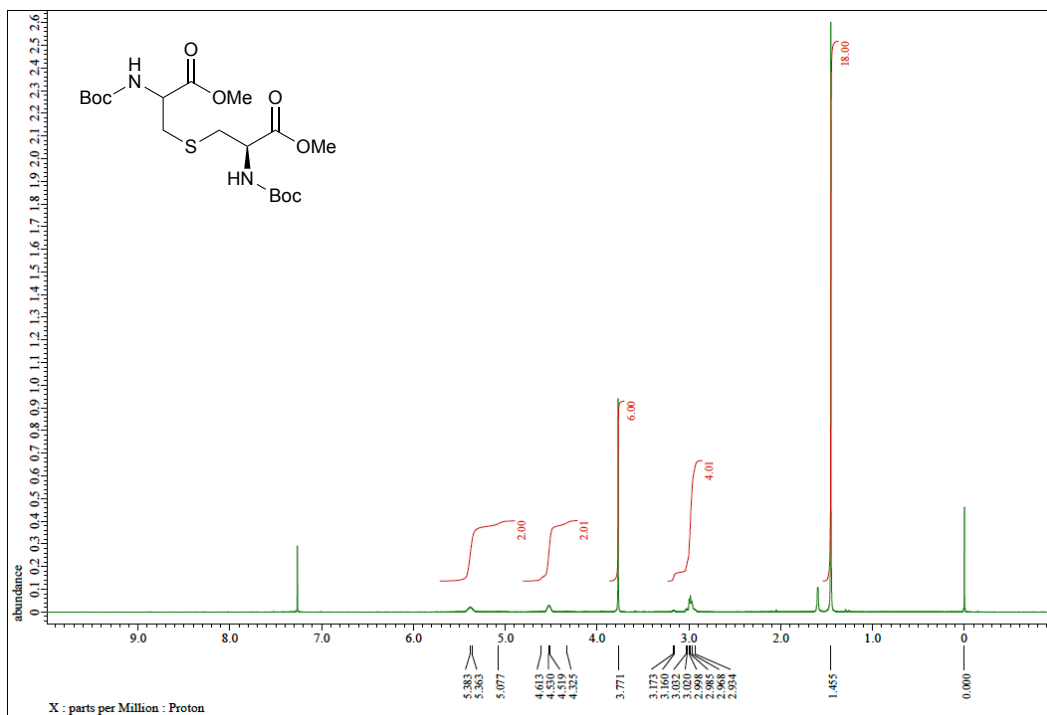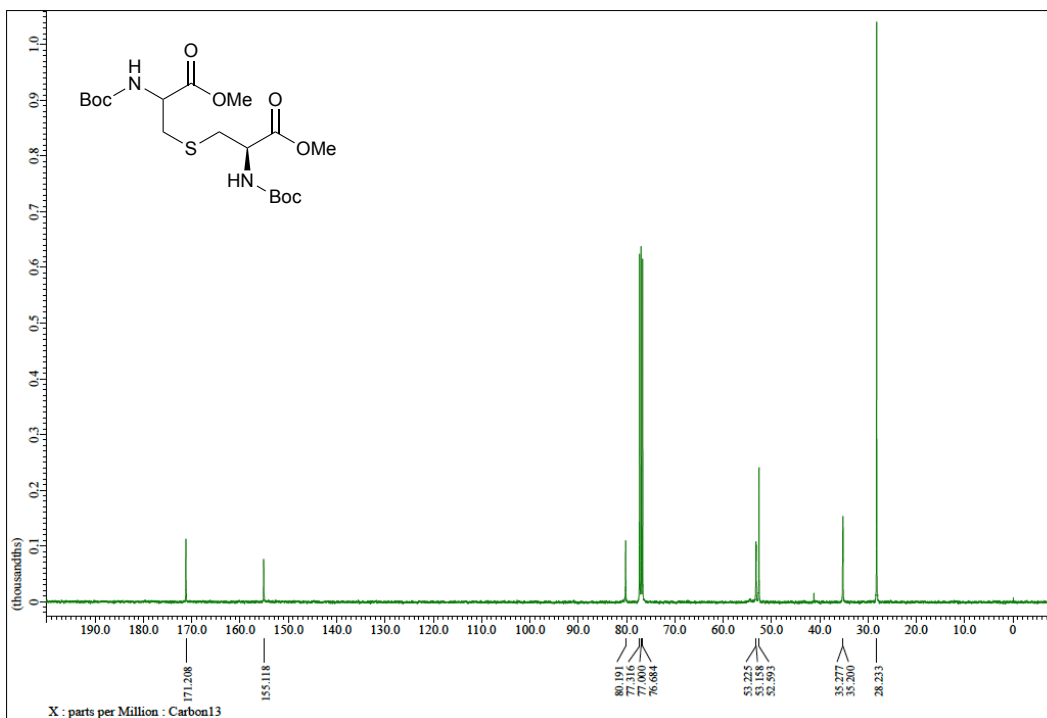

16:  $^1\text{H}$  and  $^{13}\text{C}$  NMR ( $\text{CDCl}_3$ )

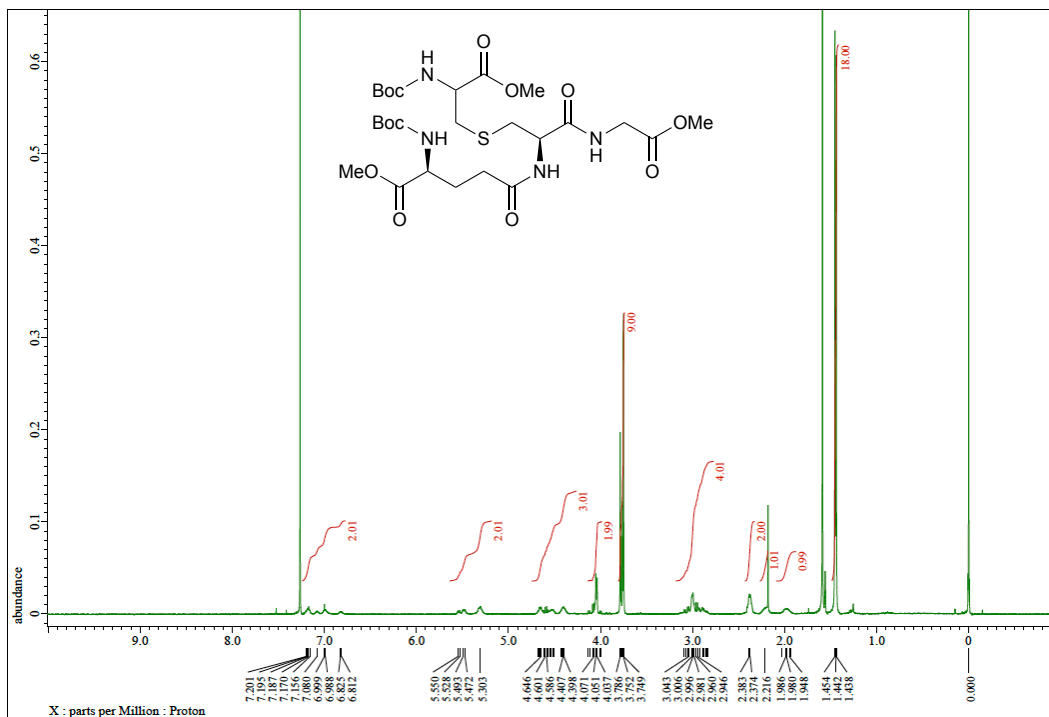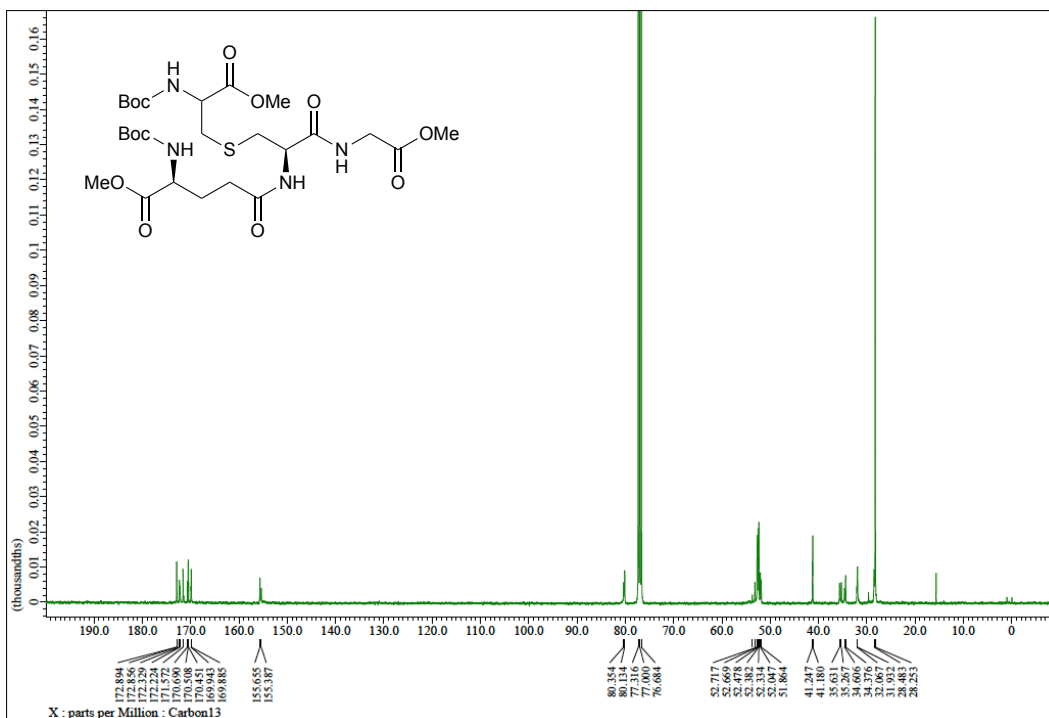

## HPLC Charts

2a: Daicel Chiralpak IE-3, hexane/2-propanol = 2:1, flow rate = 0.5 mL/min, 254 nm

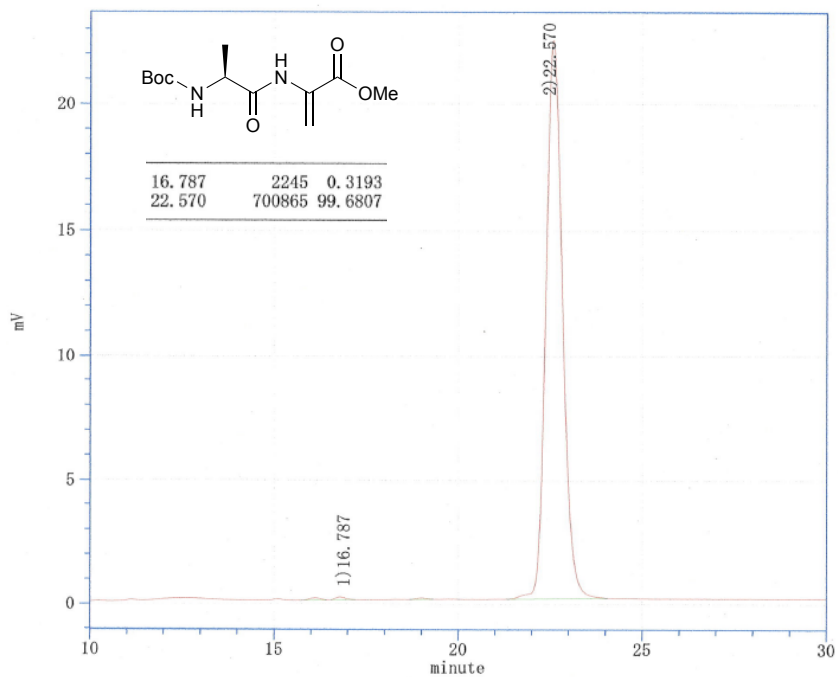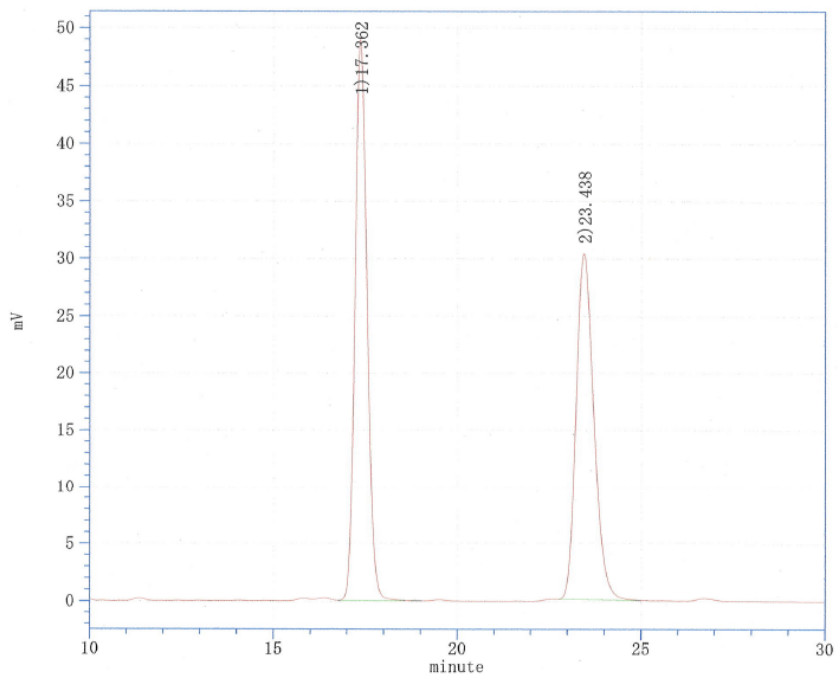

2c: Daicel Chiralpak IE-3, hexane/2-propanol = 5:1, flow rate = 0.5 mL/min, 254 nm

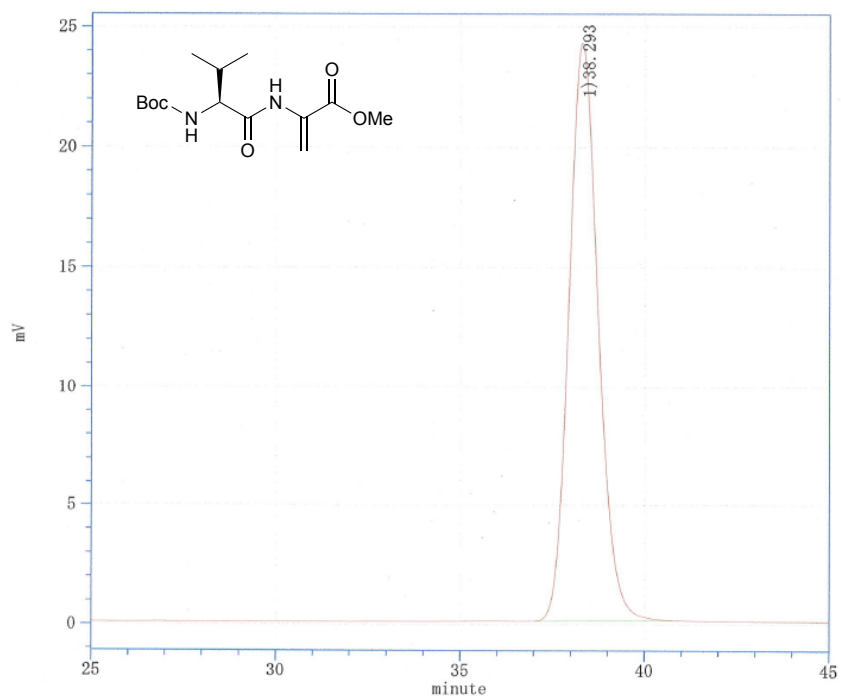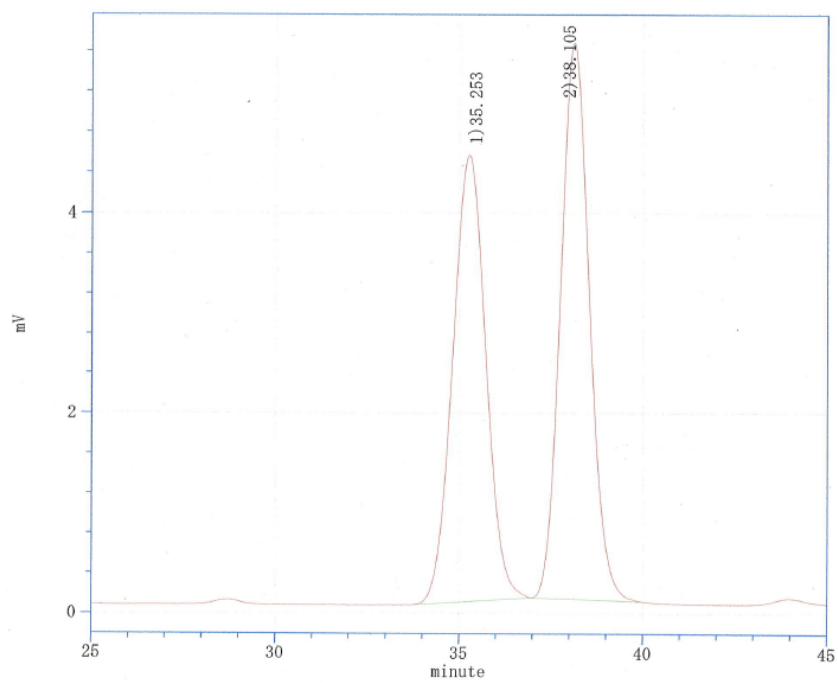

**2d**: Daicel Chiralpak IE-3, hexane/2-propanol = 2:1, flow rate = 0.5 mL/min, 254 nm

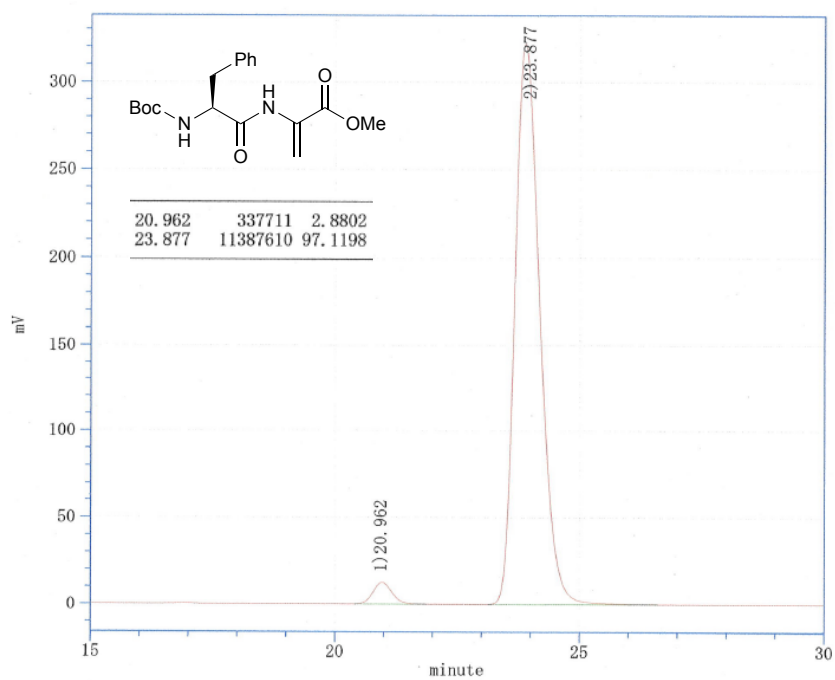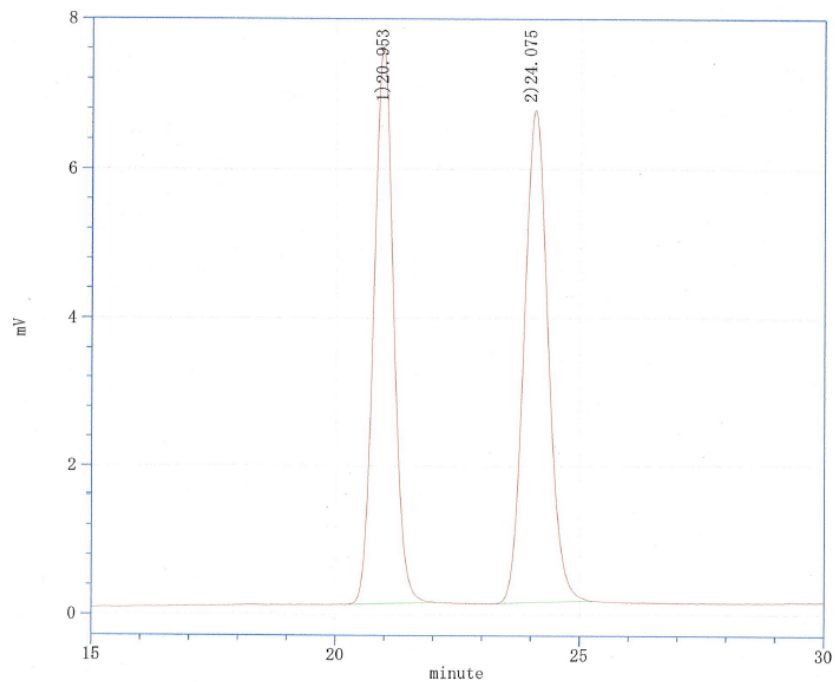

2e: Daicel Chiralpak AD-3, hexane/2-propanol = 2:1, flow rate = 0.5 mL/min, 254 nm

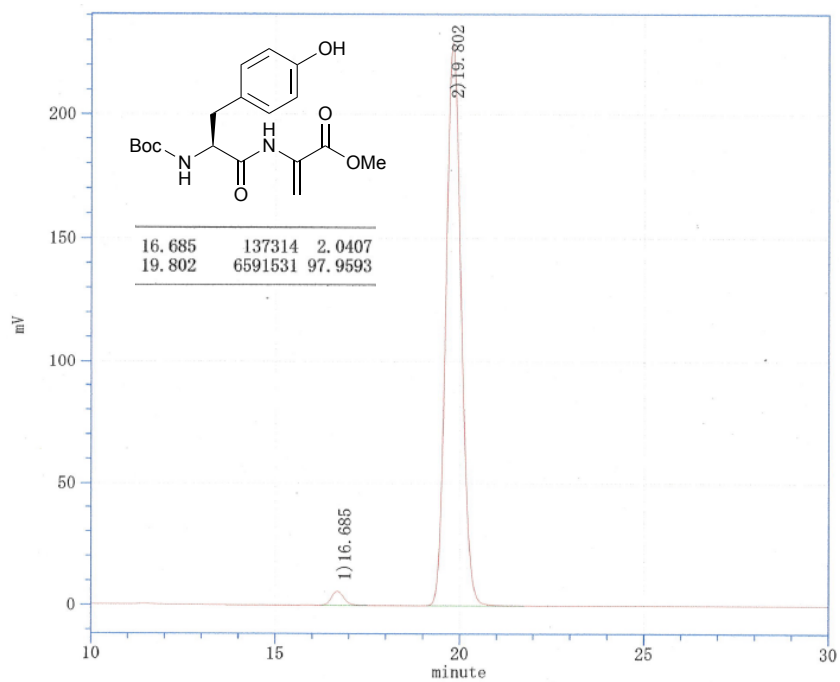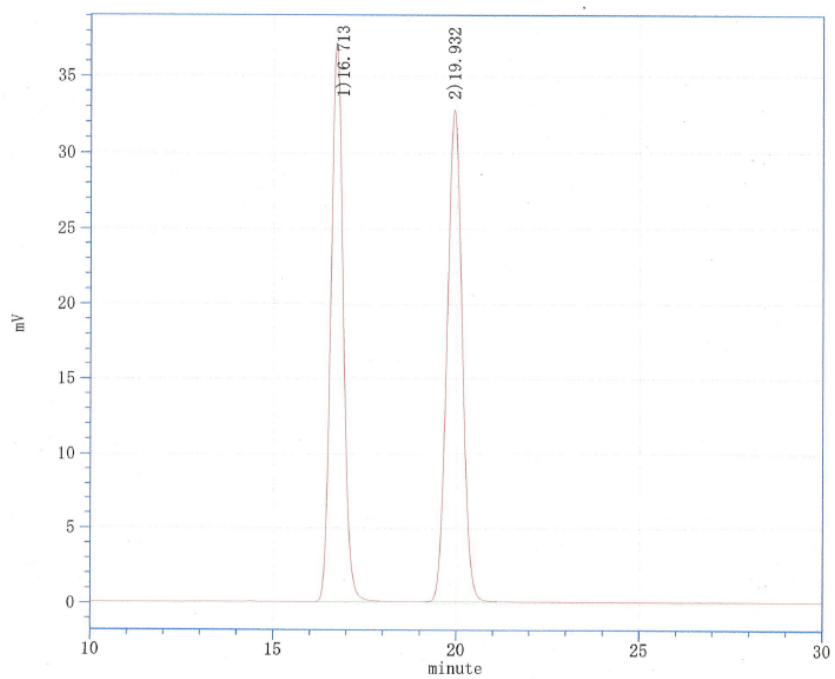

2f: Daicel Chiralpak IE-3, hexane/2-propanol = 2:1, flow rate = 0.5 mL/min, 254 nm

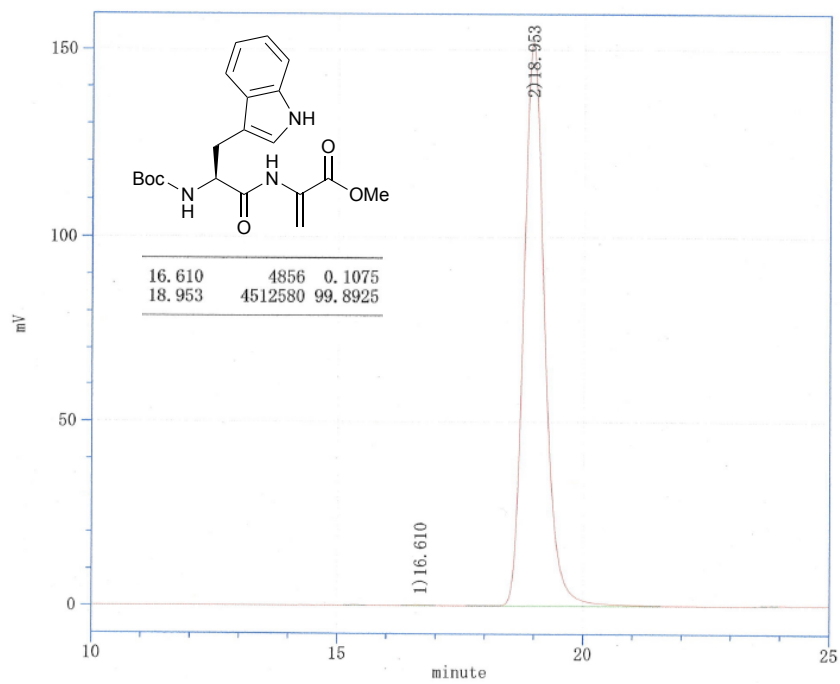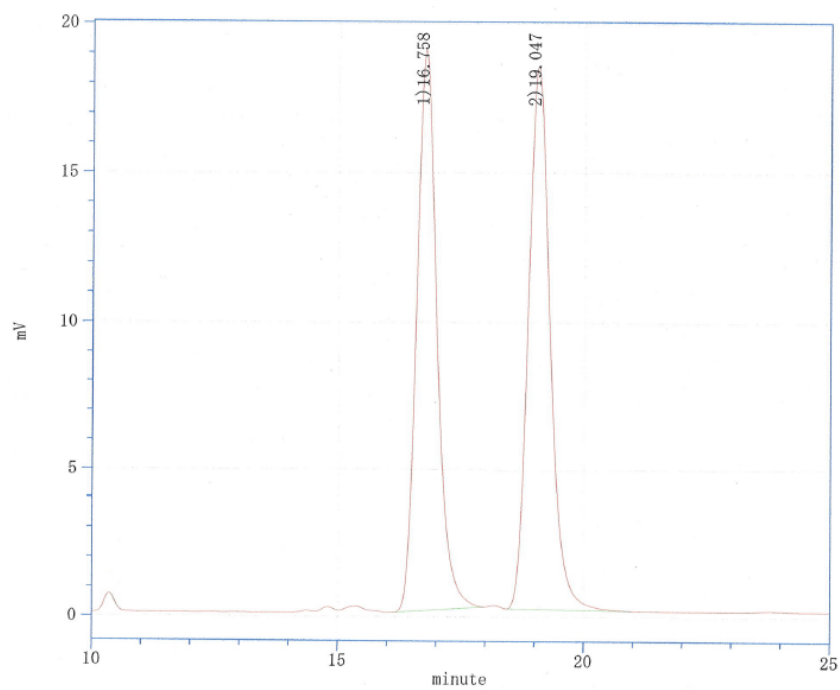



2g: Daicel Chiralpak IE-3, hexane/2-propanol = 2:1, flow rate = 0.5 mL/min, 254 nm

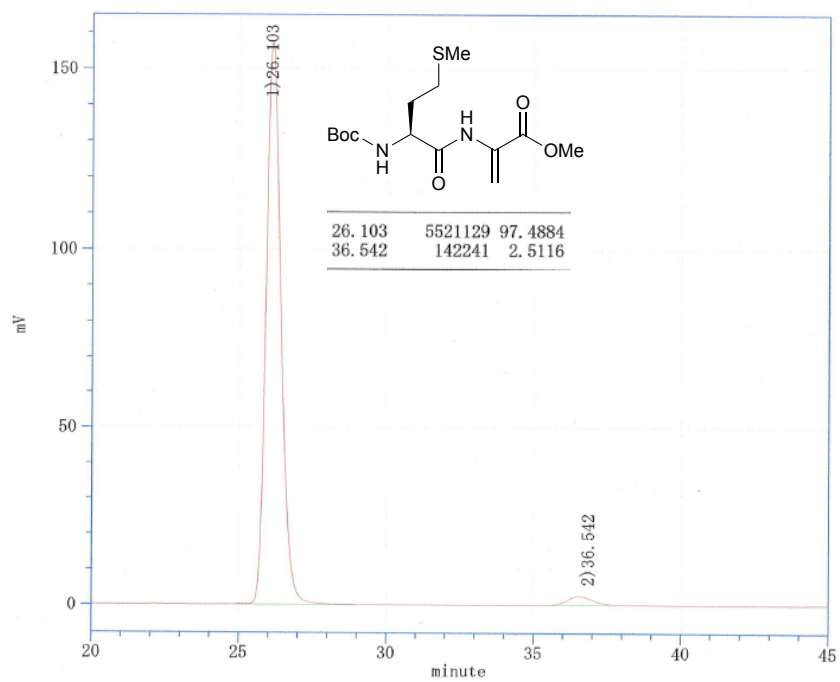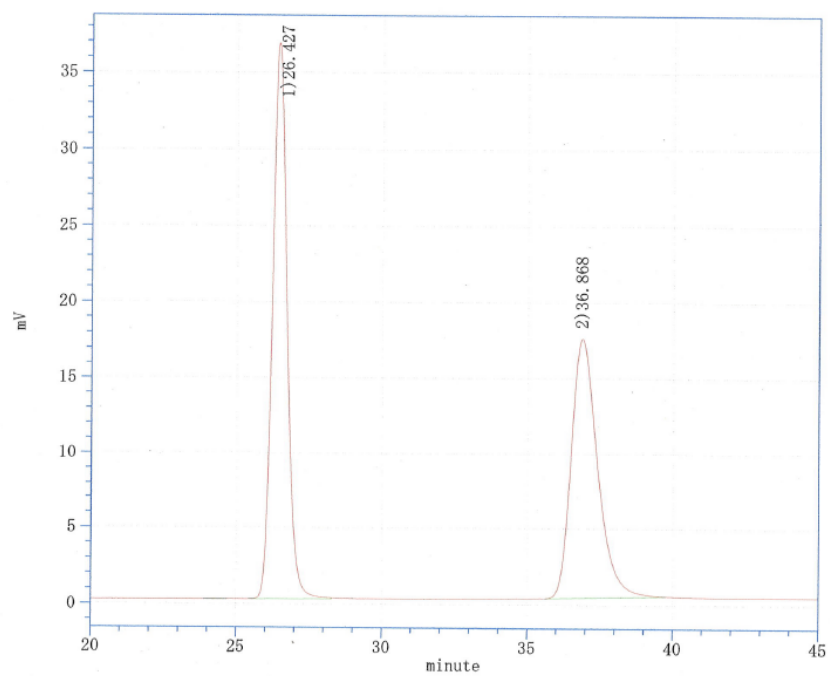

**2h:** Daicel Chiralpak IE-3, hexane/2-propanol = 1:1, flow rate = 0.5 mL/min, 254 nm

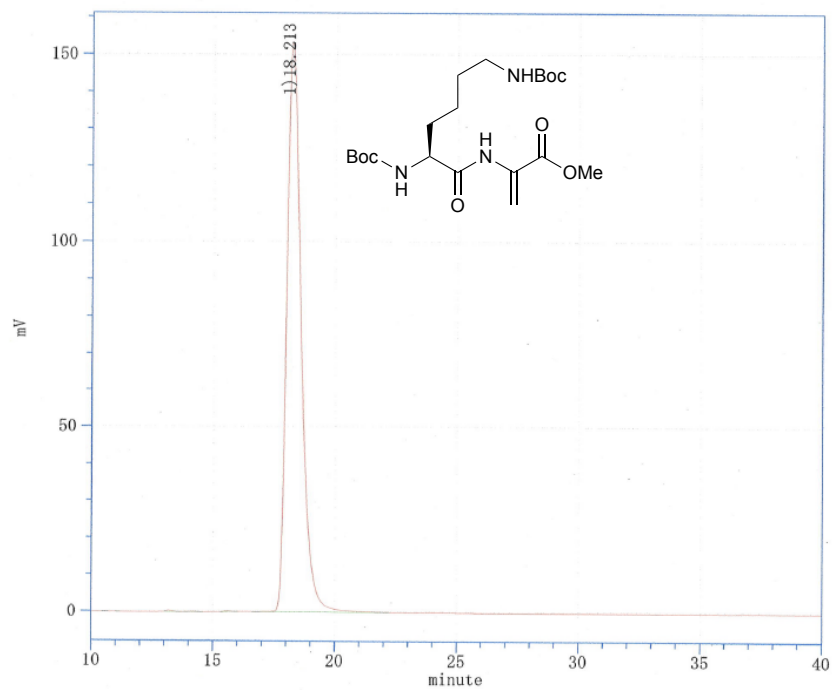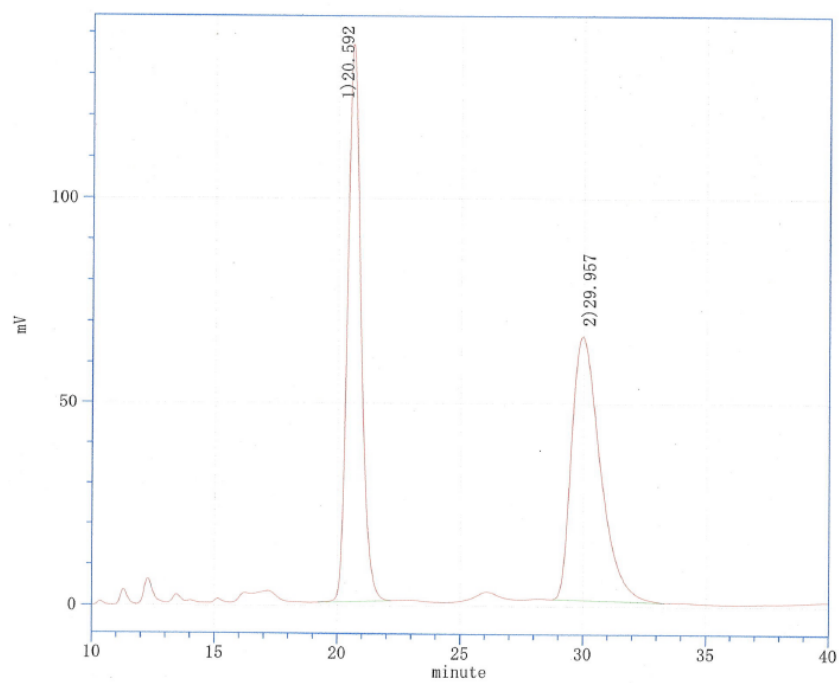

2i: Daicel Chiralpak ID-3, hexane/2-propanol = 2:1, flow rate = 0.5 mL/min, 254 nm

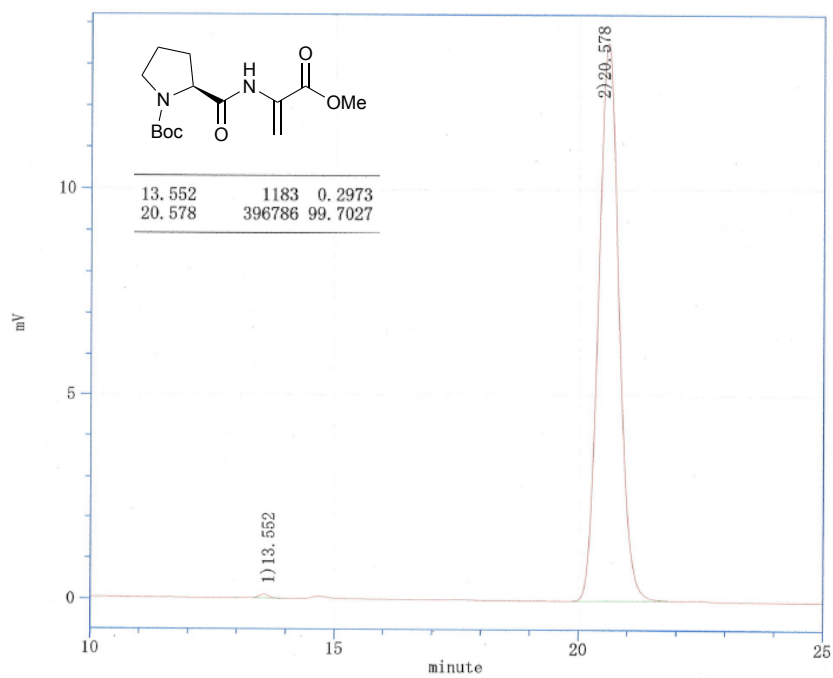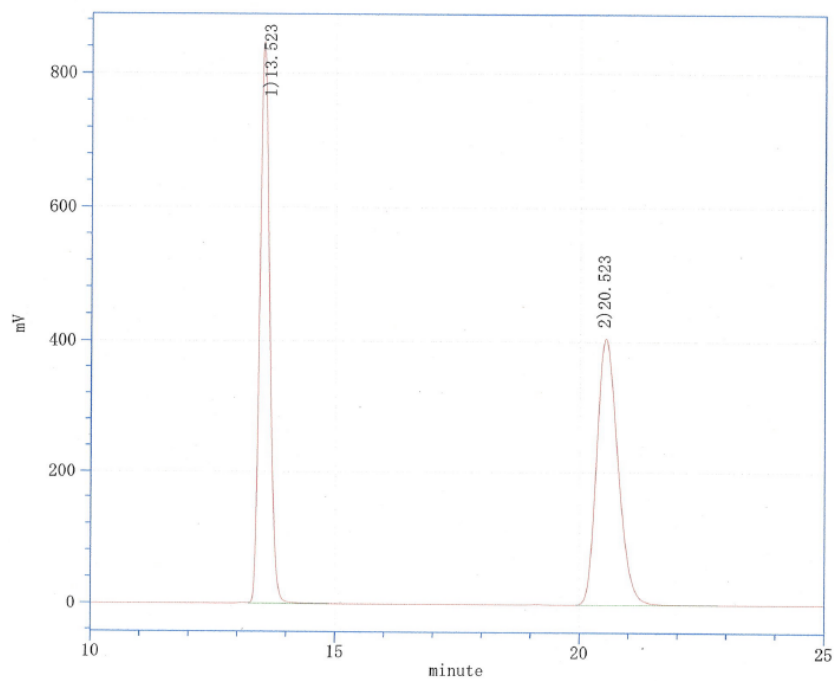

**2k:** Daicel Chiralpak IE-3, hexane/2-propanol = 2:1, flow rate = 0.5 mL/min, 254 nm

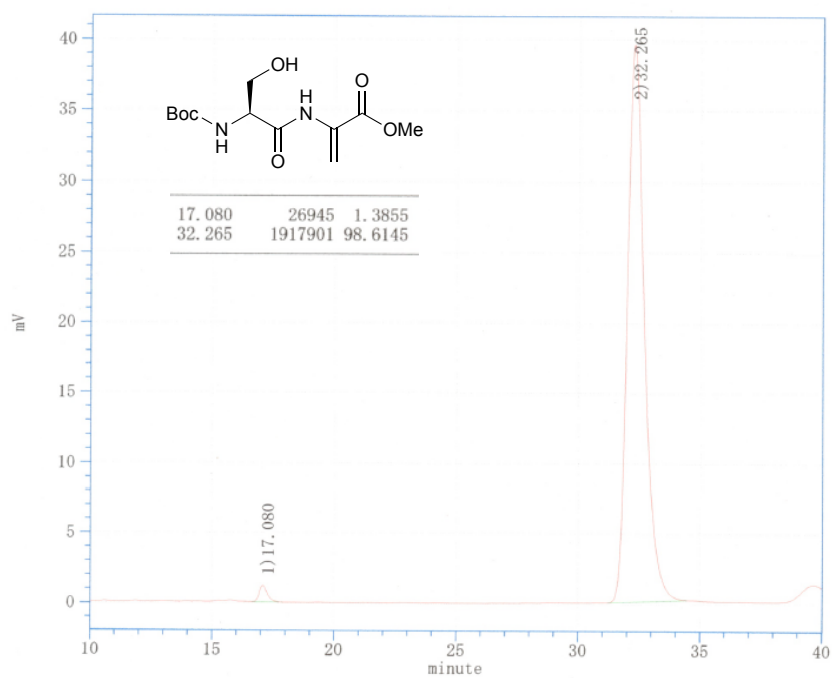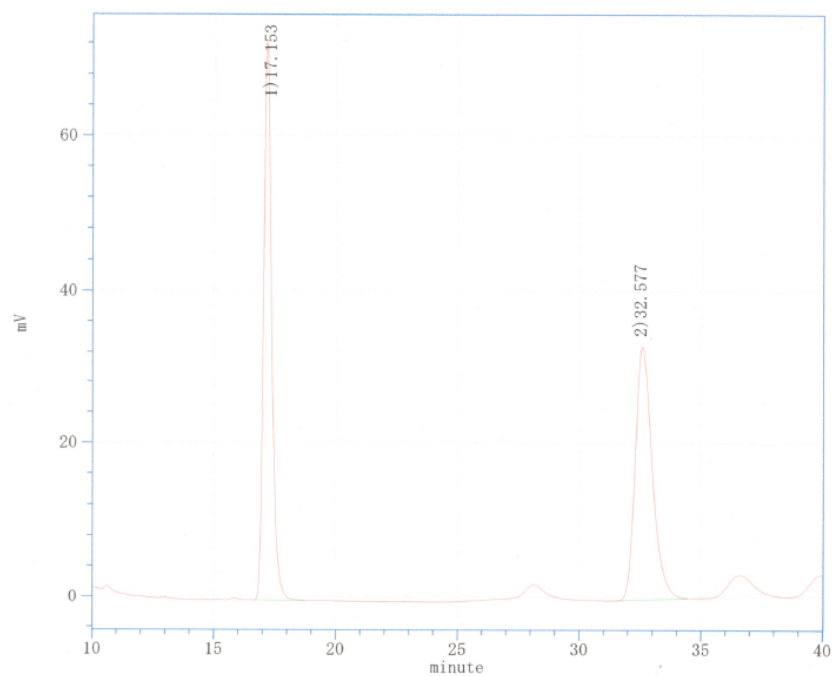

4: Daicel Chiralpak IE-3, hexane/2-propanol = 2:1, flow rate = 0.5 mL/min, 254 nm

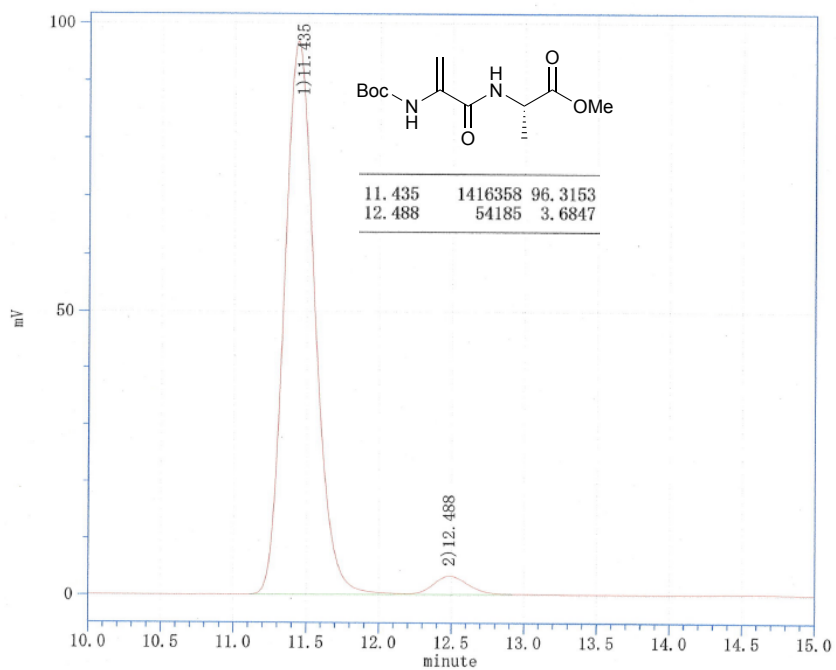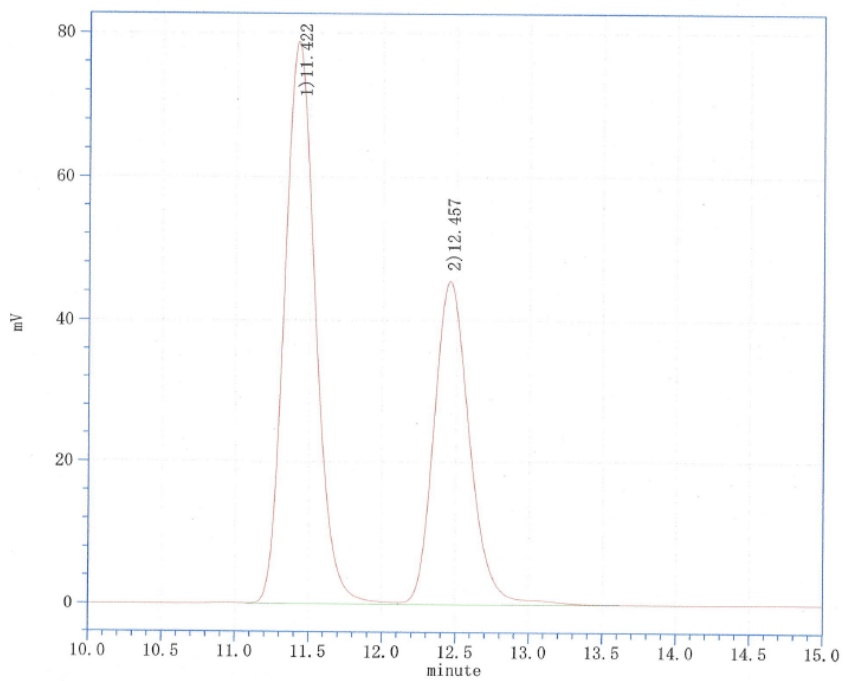

9: Daicel Chiralpak IE-3, hexane/2-propanol = 2:1, flow rate = 0.5 mL/min, 254 nm

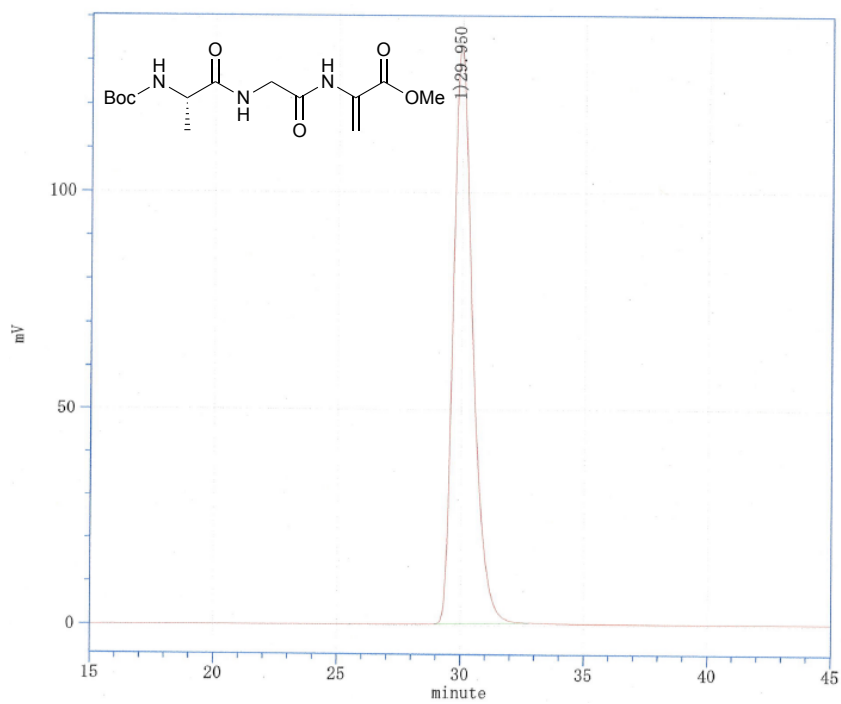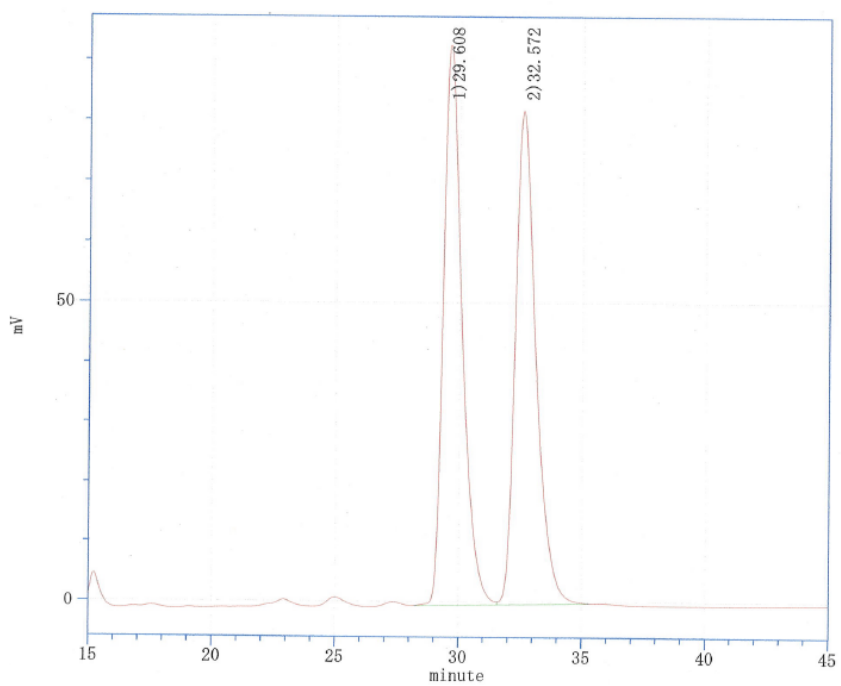

Supplement: d5cc00156k1.pdf [file d5cc00156k1.pdf]
